1 **Title:**

2 **Dissociating orexin-dependent and -independent functions of orexin neurons**  
3 **using novel *orexin-Flp* knock-in mice**

4  
5 **Authors:**

6 Srikanta Chowdhury<sup>1,2,3</sup>, Chi Jung Hung<sup>1,2,3</sup>, Shuntaro Izawa<sup>1,2,3</sup>, Ayumu Inutsuka<sup>1</sup>,  
7 Meiko Kawamura<sup>4</sup>, Takashi Kawashima<sup>5</sup>, Haruhiko Bito<sup>5</sup>, Itaru Imayoshi<sup>6</sup>, Manabu Abe<sup>4</sup>,  
8 Kenji Sakimura<sup>4</sup> and Akihiro Yamanaka<sup>1,2,3\*</sup>

9  
10 **Affiliations:**

11 <sup>1</sup>Department of Neuroscience II, Research Institute of Environmental Medicine, Nagoya  
12 University, Nagoya 464-8601, Japan

13 <sup>2</sup>Department of Neural Regulation, Nagoya University Graduate School of Medicine,  
14 Nagoya 466-8550, Japan

15 <sup>3</sup>CREST, JST, Honcho Kawaguchi, Saitama 332-0012, Japan

16 <sup>4</sup>Brain Research Institute, Niigata University, Niigata 950-2181, Japan

17 <sup>5</sup>Department of Neurochemistry, The University of Tokyo Graduate School of Medicine,  
18 Tokyo, Japan

19 <sup>6</sup>Graduate School of Biostudies, Kyoto University, Kyoto 606-8501, Japan

20

21 \* Correspondence should be addressed to:

22 Akihiro Yamanaka Ph.D.

23 E-mail: yamank@riem.nagoya-u.ac.jp

24 Research Institute of Environmental Medicine, Nagoya University, Nagoya 464-8601,  
25 Japan

26 Tel: +81-52-789-3861

27 Fax: +81-52-789-3889

1 **Abstract**

2 Uninterrupted arousal is important for survival during threatening situations. Activation of  
3 orexin/hypocretin neurons is implicated in sustained arousal. However, orexin neurons  
4 produce and release orexin as well as several co-transmitters including dynorphin and  
5 glutamate. Thus, it is important to disambiguate orexin peptide-dependent and  
6 -independent physiological functions of orexin neurons. To attain this, we generated a  
7 novel *orexin-flippase* (Flp) knock-in (KI) mouse line. Crossing with Flp-reporter or  
8 Cre-expressing mice showed gene expression exclusively in orexin neurons.  
9 Histological studies confirmed that orexin was completely knock-out (KO) in KI/KI  
10 homozygous mice. Orexin neurons without orexin showed altered electrophysiological  
11 properties, as well as received decreased glutamatergic inputs. Selective chemogenetic  
12 activation revealed that both orexin and co-transmitters functioned to increase  
13 wakefulness, however, orexin was indispensable to promote sustained arousal.  
14 Surprisingly, activation of orexin neurons without orexin caused a significant increase in  
15 the total time spent in cataplexy. Taken together, orexin is essential to maintain basic  
16 membrane properties and input-output computation of orexin neurons, as well as to exert  
17 awake-sustaining aptitude of orexin neurons.

18

19 **Keywords:** Orexin/hypocretin, flippase, electrophysiology, chemogenetics,  
20 sleep/wakefulness, cataplexy

## 1 **Introduction**

2           Orexin A (hypocretin-1) and orexin B (hypocretin-2) (de Lecea et al., 1998;  
3 Sakurai et al., 1998), generated from the same precursor protein called prepro-orexin,  
4 are endogenous ligands for two closely related G-protein-coupled receptors termed  
5 orexin-1 receptor (OX1R) and orexin-2 receptor (OX2R) (Sakurai et al., 1998). Although  
6 orexin was named for its effect on inducing feeding behavior, it gained immense interest  
7 in sleep research as the knockout (KO) of prepro-orexin or dysfunction of OX2R in  
8 canines or mice reportedly mimics the human sleep disorder narcolepsy (Chemelli et al.,  
9 1999; Lin et al., 1999). Narcolepsy is a neurological disorder characterized by  
10 fragmented sleep/wakefulness, persistent daytime sleepiness and brief episodes of  
11 muscle weakness called cataplexy, which is often triggered by positive emotions.  
12 Narcolepsy patients showed a loss of overall prepro-orexin mRNA, confirming the  
13 association between orexin neuronal loss and the pathogenesis of narcolepsy (Peyron et  
14 al., 2000; Thannickal et al., 2000).

15           A small number of orexin-producing neurons (orexin neurons) are exclusively  
16 distributed in the lateral hypothalamic area (LHA) and perifornical area, but send  
17 projections widely throughout the major brain areas (Nambu et al., 1999; Peyron et al.,  
18 1998). Thus, it is no surprise that orexin neurons have diverse physiological roles,  
19 including the regulation of sleep/wakefulness (Chemelli et al., 1999; Lin et al., 1999),  
20 energy homeostasis (Yamanaka et al., 2003), thermoregulation (Tupone et al., 2011), as  
21 well as regulation of heart rate and blood pressure (Zhang et al., 2006). Using  
22 optogenetic and/or chemogenetic techniques, we and others showed that orexin  
23 neurons modulate sleep/wake cycles in rodents (Adamantidis et al., 2007; Sasaki et al.,  
24 2011; Tsunematsu et al., 2011). In addition to these, employing transgenic mice, we  
25 reported that chemogenetic activation of orexin neurons increased locomotion, feeding  
26 behavior and metabolism (Inutsuka et al., 2014). Thus, orexin neurons are thought to

1 interact with the neuroregulatory, autonomic and neuroendocrine systems, and perform  
2 critical roles in the regulation of sleep/wakefulness and energy homeostasis.

3         The physiological activity of orexin neurons is modulated by multiple neural  
4 inputs and humoral factors. These inputs include GABAergic neurons in the preoptic  
5 area, serotonergic neurons in the dorsal and median raphe nuclei, central amygdala,  
6 basal forebrain cholinergic neurons, the bed nucleus of the stria terminalis,  
7 supraventricular zone, and the dorsomedial, lateral and posterior hypothalamus (Sakurai  
8 et al., 2005; Yoshida et al., 2006). Recently, we reported that serotonergic neurons in the  
9 raphe nucleus inhibit orexin neurons both directly and indirectly (Chowdhury and  
10 Yamanaka, 2016). Orexin neurons are also found to respond to multiple humoral factors  
11 and neuropeptides (Inutsuka and Yamanaka, 2013; Sakurai, 2014). Most interestingly,  
12 orexin neurons form a positive-feedback circuitry among themselves in the LHA by  
13 activating other orexin neurons through OX2R to maintain the wake-active network at  
14 optimum level and/or for a sustained period (Yamanaka et al., 2010a).

15         However, orexin neurons contain other neurotransmitters including glutamate  
16 (Rosin et al., 2003), dynorphin (Chou et al., 2001) and galanin (Hakansson et al., 1999).  
17 Therefore, to better understand the physiology and pathophysiology of orexin/hypocretin  
18 system, it is essential to disambiguate the roles of orexin from other co-transmitters. To  
19 address this, we generated novel *orexin-Flppase (Flp)* knock-in mice, which express Flp  
20 recombinase under control of prepro-orexin gene in mice. Employing this novel mouse  
21 line, we found that orexin performs critical roles in maintaining basic electrophysiological  
22 properties of orexin neurons as well as to initiate feed-forward activation of orexin  
23 neurons by facilitating excitatory glutamatergic inputs. Focusing on sleep/wakefulness,  
24 we also manipulated orexin neuronal activity and evaluated their physiological effects in  
25 freely-moving mice. To achieve this, we employed a chemogenetic technique, Designer  
26 Receptors Exclusively Activated by Designer Drugs (DREADD) (Armbruster et al.,

1 2007). Our results showed orexin plays the major role in the awake-sustaining aptitude  
2 of orexin neurons. Although the phenotypic consequences of orexin neurons activation  
3 in increased wakefulness was reinforced for by co-transmitters, these co-transmitters  
4 rather deteriorated cataplexy. Together, these data clearly identified the importance of  
5 orexin neuropeptides for the physiological function of orexin neurons and their  
6 postsynaptic partners.

## 1 **Results**

### 2 **Generation of novel *orexin-Flp (OF)* mice**

3 We previously generated *orexin-Cre* (Inutsuka et al., 2014) or  
4 *orexin-tetracycline-controlled trans-activator (orexin-tTA)* (Tabuchi et al., 2013)  
5 transgenic mice in which Cre recombinase or tTA was expressed in orexin neurons to  
6 allow regulation of transgene expression in the orexin neurons. However, expression of  
7 Cre and tTA in those transgenic mice was driven by a 3.2 kb short gene fragment  
8 upstream of the human prepro-orexin gene. Thus, we generated a new mouse by  
9 targeting the prepro-orexin gene of the mouse genome. Employing a homologous  
10 recombination system, here we generated *orexin-Flippase (OF)* mice by knocking in the  
11 EGFP-2A-Flp transgene just downstream of the translation initiation site of the  
12 prepro-orexin gene in-frame (Figure 1A). To visualize the function of Flp recombinase,  
13 we bred these mice with Flp-reporter (*FSF-mTFP1*) mice (Imayoshi et al., 2012) in which  
14 fluorescent protein mTFP1 is expressed in a Flp-dependent manner (Figure 1B).  
15 Immunohistochemical analysis showed mTFP expression in  $80.9 \pm 4.4\%$  of  
16 orexin-immunoreactive neurons. We observed no ectopic expression of EGFP and/or  
17 mTFP1 protein in melanin-concentrating hormone (MCH)-immunoreactive ( $n = 4$  mice;  
18 Figure 1C and 1D) or in any other non-orexin-immunoreactive neurons in these bigenic  
19 mice. Together, these data confirmed that functional Flp was expressed exclusively in  
20 the orexin neurons of newly generated *OF* mice.

21

### 22 ***OF* mice enable the dual targeting of adjacent cell types**

23 By taking advantage of the vast repertoire of cell type-specific Cre- or tTA-expressing  
24 mice, the new *OF* mice may enable the expression of various genes in different subsets  
25 of neurons (Figure 2A). To confirm this, we next generated two different bigenic mice by  
26 crossing *OF* mice with *MCH-Cre* or *Gad67-Cre* mice (Figure 2B and 2E). *MCH-Cre* or

1 *Gad67-Cre* mice exclusively express Cre recombinase in MCH or GABA neurons,  
2 respectively (Higo et al., 2009; Kong et al., 2010). To test whether we could target dual  
3 cell types simultaneously inside the LHA, we performed injection of an AAV cocktail  
4 composed of an equal volume of AAV(DJ)-CMV-FLEX-tdTomato and  
5 AAV(DJ)-CMV-dFRT-hrGFP in both *orexin-Flp; MCH-Cre* and *orexin-Flp; Gad67-Cre*  
6 bigenic mice (Figure 2C and 2F). Given that MCH and GABA neurons are distinct  
7 neuronal subsets from orexin neurons in the LHA (Broberger et al., 1998; Rosin et al.,  
8 2003), we expected a discrete expression of tdTomato and hrGFP in both bigenic mice.  
9 Indeed, we observed that Flp and Cre recombinase-driven fluorescent protein  
10 expression did occur in distinct populations (Figure 2D and 2G) in coronal brain sections  
11 (n = 3 mice for each). These data demonstrated that a broader range of opportunities for  
12 cell type-specific manipulation and/or activity recording is possible with *OF* mice.

13

#### 14 ***OF* (KI/KI) homozygote knockout orexin peptides**

15 Since the EGFP-2A-Flp sequence was inserted in-frame at the start codon of the  
16 prepro-orexin gene using the KI method, we reasoned that KI/KI homozygous mice are  
17 essentially orexin-KO mice. To confirm, immunohistochemical studies were conducted to  
18 compare the expression of EGFP, orexin and dynorphin in the LHA of heterozygous *OF*  
19 (KI/-) and homozygous *OF* (KI/KI) mice (Figure 3A and 3B). As expected, we found that  
20 EGFP expressing neurons were distributed in the LHA, however,  
21 orexin-immunoreactivity was absent in the LHA in *OF* (KI/KI) homozygous mice (Figure  
22 3B). We stained every 4<sup>th</sup> slice of mouse brain containing LHA and counted  $567 \pm 25$   
23 orexin-positive and  $673 \pm 55$  dynorphin-positive cells/animal in heterozygous mice (n = 3  
24 mice). Among the counted neurons,  $84.9 \pm 4.4\%$  of dynorphin-positive neurons  
25 co-expressed orexin. However, while we counted  $661 \pm 15$  dynorphin-positive  
26 cells/animal, we did not find any orexin-positive neurons in the homozygous mice (n = 3

1 mice, Hetero vs Homo,  $p = 0.847$  (dynorphin),  $p = 2.4e-5$  (orexin), unpaired  $t$ -test),  
2 showing that the number of dynorphin-positive cells were comparable to that in  
3 heterozygous animals. These immunohistochemical studies confirmed that orexin  
4 neurons in homozygous mice did not express orexin, however, expression of dynorphin  
5 was unaffected.

6

### 7 **Electrophysiological properties of orexin neurons lacking orexin**

8 The expression of EGFP in the *OF* mice allowed us to visualize orexin neurons in the  
9 acute brain slice preparations. To this end, we sought to evaluate the importance of  
10 orexin neuropeptides in conserving the electrophysiological properties of orexin  
11 neurons. Therefore, we recorded and compared resting membrane potentials ( $V_{rest}$ ),  
12 firing frequency, input resistance and capacitance in *OF* (KI/-), *OF* (KI/KI), and  
13 *orexin-EGFP* (Tg/Tg) (*OE*) mice (Yamanaka et al., 2003) (Figure 4A-4E). Orexin neurons  
14 in the *OF* (KI/KI) mice were found to have significantly hyperpolarized membrane  
15 potential ( $-58.8 \pm 1.2$  mV;  $n = 21$ ) compared to *OF* (KI/-) mice ( $-51.6 \pm 0.9$  mV;  $n = 21$ ,  $p =$   
16  $1.0e-5$ ) and *OE* mice ( $-50.4 \pm 0.9$  mV;  $n = 22$ ,  $p = 3.5e-7$ ; Figure 4A-i to 4A-iv).  
17 Spontaneous firing frequency measured by cell-attached recordings were also found to  
18 be significantly lower in orexin neurons in *OF* (KI/KI) mice ( $1.5 \pm 0.2$  Hz;  $n = 25$ )  
19 compared to *OF* (KI/-) mice ( $2.5 \pm 0.3$  Hz;  $n = 21$ ,  $p = 0.015$ ) and *OE* mice ( $2.6 \pm 0.2$  Hz;  
20  $n = 25$ ,  $p = 0.004$ ; Figure 4B-i to 4B-iv). This lower discharge rate could be attributed to  
21 the hyperpolarized membrane potential of orexin neurons in homozygous mice. We next  
22 measured the input resistance of identified neurons by measuring the voltage deviation  
23 generated by current injection from -100 to +100 pA in the current clamp protocol. In mice  
24 lacking orexin peptide (*OF* (KI/KI) mice), orexin neurons were found to have significantly  
25 lower input resistance ( $485.9 \pm 35.8$  M $\Omega$ ;  $n = 23$ ) compared to *OF* (KI/-) mice ( $639.9 \pm$   
26  $48.2$  M $\Omega$ ;  $n = 21$ ,  $p = 0.037$ ) and *OE* mice ( $638.2 \pm 43.4$  M $\Omega$ ;  $n = 24$ ,  $p = 0.032$ ; Figure



1 4C-i to 4C-iv). The lower input resistance in neurons lacking orexin peptides suggests  
2 that greater synaptic inputs (current injection) are necessary to generate changes in  
3 membrane potential. We also compared the membrane capacitance measured during  
4 whole-cell recordings. Interestingly, we observed that orexin neurons in *OF* (KI/KI) mice  
5 had significantly higher membrane capacitance ( $35.4 \pm 1.3$  pF;  $n = 25$ ) than *OF* (KI/-)  
6 mice ( $29.9 \pm 1.5$  pF;  $n = 25$ ,  $p = 0.012$ ) and *OE* mice ( $30.0 \pm 1.3$  pF;  $n = 25$ ,  $p = 0.014$ ,  
7 one-way ANOVA post-hoc Tukey; Figure 4E). This higher capacitance in orexin neurons  
8 that lack orexin peptides reflects the increased surface area of the plasma membrane.  
9 Taken together, these data clearly suggest that orexin neuropeptide is essential for  
10 maintaining the active and passive electrophysiological properties of orexin neurons.

11

## 12 **Orexin mediates feed-forward activation of orexin neurons via facilitation of** 13 **glutamatergic inputs**

14 To characterize whether the excitatory and inhibitory synaptic inputs onto orexin neurons  
15 are regulated by the presence or absence of orexin peptides, we recorded glutamatergic  
16 and GABAergic inputs using the voltage clamp method. We recorded spontaneous  
17 excitatory post-synaptic currents (sEPSCs) from EGFP-expressing orexin neurons in the  
18 presence of picrotoxin ( $400 \mu\text{M}$ ), a GABA-A receptor antagonist. We found that orexin  
19 neurons lacking orexin protein had significantly lower sEPSC frequency while the  
20 amplitudes were unaffected (Figure 5A-5E). The average inter-event interval for all  
21 recorded sEPSCs of orexin neurons in *OF* (KI/KI) mice was  $247.2 \pm 48.6$  ms ( $n = 29$ )  
22 while that of *OF* (KI/-) mice was  $116.7 \pm 7.6$  ms ( $n = 25$ ,  $p = 0.01$  vs *OF* (KI/KI)) and *OE*  
23 mice was  $77.9 \pm 7.4$  ms ( $n = 26$ ,  $p = 5.8\text{e-}4$  vs *OF* (KI/KI), one-way ANOVA pot-hoc  
24 Tukey; Figure 5D). The sEPSC amplitude of orexin neurons in *OF* (KI/KI) mice was  $22.6$   
25  $\pm 1.3$  pA ( $n = 29$ ) while that of *OF* (KI/-) mice was  $22.6 \pm 1.3$  pA ( $n = 25$ ,  $p = 1.0$  *OF* (KI/KI))  
26 and in *OE* mice was  $20.5 \pm 1.1$  pA ( $n = 26$ ,  $p = 0.46$  vs *OF* (KI/KI), one-way ANOVA

1 post-hoc Tukey; Figure 5E).

2           Next, we recorded spontaneous inhibitory post-synaptic currents (sIPSCs)  
3 from orexin neurons in the presence of CNQX (20  $\mu$ M) and AP-5 (50  $\mu$ M) to block  
4 glutamatergic inputs. Although sIPSCs in neurons lacking orexin peptides showed a  
5 tendency toward decreasing frequency and amplitude, these changes were not  
6 statistically significant. The inter-event interval for sIPSCs in orexin neurons in *OF* (KI/KI)  
7 mice was  $835.0 \pm 124.6$  ms ( $n = 17$ ) while that of *OF* (KI/-) mice was  $642.4 \pm 70.9$  ms ( $n$   
8  $= 22$ ,  $p = 0.35$  vs *OF* (KI/KI)) and in *OE* mice was  $595.0 \pm 96.7$  ms ( $n = 21$ ,  $p = 0.21$  vs *OF*  
9 (KI/KI), one-way ANOVA post-hoc Tukey; Figure 5H). The sIPSC amplitude in orexin  
10 neurons in *OF* (KI/KI) mice was  $48.4 \pm 6.1$  pA ( $n = 17$ ) while that of *OF* (KI/-) mice was  
11  $52.5 \pm 3.9$  pA ( $n = 22$ ,  $p = 0.86$  vs *OF* (KI/KI)) and in *OE* mice was  $57.7 \pm 6.5$  pA ( $n = 21$ ,  
12  $p = 0.48$  vs *OF* (KI/KI), one-way ANOVA post-hoc Tukey; Figure 5I). These, along with  
13 previous, results indicate that orexin plays a role in maintaining the physiological  
14 input-output functions in orexin neurons.

15

### 16 ***OF* (KI/KI) mice showed symptoms in narcolepsy**

17 We reasoned that if orexin is successfully knocked out from *OF* (KI/KI) mice, it must  
18 show the sign of behavioral arrest, cataplexy, which is defined as the sudden and  
19 reversible episodes of the drop of voluntary muscle tone while remains fully conscious  
20 during the episodes (Tabuchi et al., 2014a). Thus, we recorded and analyzed the  
21 baseline sleep/wakefulness cycle in *OF* (KI/KI) mice. Behavioral states shown by *OF*  
22 (KI/KI) mice were classified in 4 states which includes either wakefulness, REM, NREM  
23 or cataplexy (see methods). All recorded *OF* (KI/KI) mice showed cataplexy attack,  
24 especially during the start of the dark period. Sleep state parameters for orexin knockout  
25 mice are presented in Table 1. These values were comparable with our previously  
26 generated orexin neuron-ablated mice (Tabuchi et al., 2014a), as well as with the

1 previously generated orexin-knockout mice (Chemelli et al., 1999).

2

### 3 **Chemogenetic activation of orexin neurons lacking orexin neuropeptides**

4 Next, we sought to isolate the physiological effects of orexin from those of all other  
5 neurotransmitters co-released by orexin neurons. To achieve this, we employed  
6 chemogenetics, DREADD. Using Flp recombinase-dependent gene expression, hM3Dq  
7 was exclusively expressed in orexin neurons. Here, hM3Dq was fused with mCherry to  
8 detect expression and localization. AAV(9)-CMV-dFRT-hM3Dq-mCherry was injected  
9 bilaterally into the LHA of both homozygous *OF* (KI/KI) and heterozygous *OF* (KI/-) mice  
10 (Figure 6A). We quantified the number of orexin-positive cells in every 4<sup>th</sup> brain slices.  
11 The number of orexin-immunoreactive cells was  $439 \pm 23$  cells/mouse in the brain of  
12 heterozygous mice and, among these,  $92.1 \pm 0.6\%$  expressed mCherry (n = 3 mice;  
13 Figure 6B). Moreover, a very similar number of LHA neurons expressed mCherry in both  
14 heterozygous and homozygous mice:  $422 \pm 80$  cells/mouse (n = 6) in *OF* (KI/-) and  $455 \pm$   
15  $74$  cells/mouse (n = 6) in *OF* (KI/KI) mice expressed mCherry ( $p = 0.76$ , unpaired *t*-test).  
16 To confirm the selective activation of hM3Dq-expressing neurons *in vivo*, we measured  
17 the expression of an immediate early gene product, c-Fos, which is a surrogate  
18 molecular marker of neuronal activity. Following the behavioral studies, 6 randomly  
19 selected mice from both the heterozygous and homozygous groups received i.p.  
20 administration of either saline or clozapine N-Oxide (CNO) (1.0 mg/kg). Animals were  
21 perfused, and tissues were collected 90 min after the injection. c-Fos staining of brain  
22 slices confirmed that CNO selectively activated hM3Dq-expressing neurons in both  
23 heterozygous and homozygous mice. In heterozygous mice, the ratio of c-Fos  
24 expression in mCherry-positive cells of saline or CNO injected mice was  $11.6 \pm 1.9\%$  or  
25  $89.2 \pm 1.4\%$ , respectively (n = 3 mice/group,  $p = 9.2e-5$ , Figure 6C-6D). In homozygous  
26 mice, the ratio of c-Fos expression in mCherry-positive cells of saline or CNO injected

1 mice was  $10.6 \pm 1.8\%$  or  $90.3 \pm 1.1\%$ , respectively ( $n = 3$  mice/group,  $p = 9.6e-4$ , paired  
2 *t*-test, Figure 6C-6D). Thus, we concluded that the DREADD system successfully  
3 enabled selective activation of orexin neurons in both heterozygous and homozygous  
4 mice.

5

6 **Orexin, and not other co-transmitters, was critical to promote sustained**  
7 **wakefulness and preventing cataplexy**

8 To this end, we compared the effect of chemogenetic activation of orexin neurons on  
9 sleep/wakefulness. Mice were injected with either saline or CNO during the light (L)  
10 period (at 10:00 AM) and the dark (D) period (at 10:00 PM; Figure 6E). Expectedly in *OF*  
11 (*KI/-*) mice, activation of orexin neurons increased total time spent in wakefulness ( $n = 9$ ,  
12 Figure 7B-i and 8D-i) and decreased time in REM sleep (Figure 7B-ii and 7D-ii) and in  
13 NREM sleep (Figure 7B-iii and 7D-iii) after CNO administration during both the light and  
14 dark periods. However, while the effects of orexin neuronal activation in *OF* (*KI/KI*) mice  
15 were comparable to the *OF* (*KI/-*) control during the dark period, it was dampened during  
16 the light period ( $n = 8$ , Wakefulness: Figure 7B-i and 7D-i); REM sleep: Figure 7B-ii and  
17 7D-ii; and NREM sleep: Figure 7B-iii and 7B-iii).

18 This clear difference could be explained by the ability of co-transmitters to  
19 partially compensate for the increased wakefulness. Therefore, we hypothesized that the  
20 co-transmitters could eventually rescue *OF* (*KI/KI*) mice from cataplexy as well.  
21 Surprisingly, however, activation of orexin neurons that lacked orexin peptide rather  
22 deteriorate the cataplexy during the light periods while it showed similar propensity  
23 during the dark period (saline (L):  $0.2 \pm 0.1$  min/hr; CNO (L):  $0.9 \pm 0.3$  min/hr,  $n = 8$ ,  $p =$   
24  $0.04$ ; saline (D):  $3.0 \pm 1.2$  min/hr; CNO (D):  $5.2 \pm 1.4$  min/hr,  $n = 8$ ,  $p = 0.14$ ; Figure 7B-iv  
25 and 7D-iv). These results clearly suggested that neurotransmitters other than orexin  
26 could partially compensate for abnormalities in the regulation of sleep/wakefulness,

1 excluding cataplexy.

2           We also compared the effect of orexin neuronal activation in the number of  
3 episodes (bouts) and average time spent in each vigilance state. Whereas, in *OF* (KI/-)  
4 mice, total observed bouts decrease in all 3 vigilance states for 2 hours after CNO  
5 injection (Wakefulness: Figure 7C-i and 7E-i; REM: Figure 7C-ii and 7E-ii, NREM: Figure  
6 7C-iii and 7E-iii), they remain unaffected in case of *OF* (KI/KI) mice (Wakefulness: Figure  
7 7C-i and 7E-i; REM: Figure 7C-ii and 7E-ii, NREM: Figure 7C-iii and 7E-iii; Cataplexy:  
8 Figure 7C-iv and 7E-iv). Conversely, orexin neuronal activation increased average wake  
9 duration in *OF* (KI/-) mice (Figure 7C-i and 7E-i); and decreased REM sleep (Figure 7C-ii  
10 and 7E-ii) and NREM sleep duration (Figure 7C-iii and 7E-iii). However, in case of *OF*  
11 (KI/KI) mice, total wake time was increased after chemogenetic activation of orexin  
12 neurons (Figure 7B and 7E i-iv), duration of wake was not extended (Wakefulness:  
13 Figure 7C-i and 7E-i; REM: Figure 7C-ii and 7E-ii; NREM: Figure 7C-iii and 7E-iii;  
14 Cataplexy: Figure 7C-iv and 7E-iv). Together, all these experimental analyses indicated  
15 that orexin neuropeptide was indispensable to promote sustained arousal, where the  
16 co-transmitters could not compensate.

17

### 18 **CNO-induced cataplexy was not different from naïve cataplexy**

19 Finally, we sought to answer the question of whether CNO-induced increased in  
20 cataplexy attack showed similar properties to naïve cataplexy. We analyzed and  
21 compared the relative power spectrum EEG during the cataplexy episode in the daytime  
22 after saline or CNO administration as chemogenetic activation of orexin-KO neurons  
23 resulted in increased cataplexy in the daytime (Figure 8). Relative power analysis  
24 showed no difference in either power of the delta, theta, alpha or beta wave (n = 8 mice,  
25 Figure 8C), suggesting that CNO-induced cataplexy showed similar electrocortical  
26 activity as the naïve cataplexy attack observed in *OF* (KI/-) mice.

1

2

## 1 **Discussion**

2           It has been shown that orexin neurons possess several neurotransmitters and  
3 release them together with orexin. However, orexin- or OX2R-KO mice closely  
4 phenocopy the symptoms observed in human narcolepsy, which is caused by the  
5 specific degeneration of orexin neurons. This might suggest that other neurotransmitters  
6 have either no or insignificant role in the regulation of sleep/wakefulness. Physiological  
7 importance of orexin can be explored in several ways including central administration,  
8 KO, functional manipulation or ablation of source neurons, among others. Here, we  
9 dissociated the effect of orexin by applying electrophysiological analyses and neural  
10 activity manipulation to orexin neurons that lack orexin peptide using novel KI mice.  
11 Previously, we generated *orexin-Cre* or *orexin-tTA* transgenic mice in which a short 3.2  
12 kb fragment from the 5'-upstream region of the human prepro-orexin gene was used as a  
13 promoter (Inutsuka et al., 2014; Sakurai et al., 1999; Tabuchi et al., 2013; Yamanaka et  
14 al., 2003). However, the random integration of the *orexin-Cre* or *orexin-tTA* transgene  
15 into the genome could result in ectopic gene expression in non-targeted cells as well as  
16 unexpected expression during development, as the timing and regulation of gene  
17 expression might be affected by genes located near the integrated locus. This could be  
18 problematic if these mouse lines were bred with reporter mice. In contrast, KI permits  
19 accurate temporo-spatial gene expression control. The Flp function was restricted in  
20 orexin neurons in the *OF* mice as confirmed by reporter mice. To our knowledge, *OF*  
21 mice represent the first line which enabled exclusive gene expression in orexin neurons  
22 by crossing with reporter mice. Moreover, combining Flp and Cre driver mice enable us  
23 to express different genes in different neuronal subtypes to apply neural manipulations  
24 and/or activity readout simultaneously. By crossing *OF* mice with either *MCH-Cre* or  
25 *Gad67-Cre*, we generated *orexin-Flp; MCH-Cre* and *orexin-Flp; Gad67-Cre* bigenic  
26 mice, and argued that *OF* mice could be an essential tool for studying the functional

1 connectome between orexin neurons and any other neurons in the hypothalamus.  
2 Besides, *OF* mice can also be useful for analyzing long-range neuronal connections. By  
3 using the *orexin-Flp; Gad67-Cre* bigenic mice, we recently found that GABAergic  
4 neurons in the ventral tegmental area inhibited orexin neuronal activity by making  
5 monosynaptic inhibitory projections (Chowdhury et al., *Manuscript submitted*).

6 Previously, we reported that orexin neuropeptide depolarized orexin neurons  
7 via OX2R and mediates a positive-feedback loop both directly and indirectly (Yamanaka  
8 et al., 2010b). In agreement with this, we also found that orexin facilitated glutamate  
9 release onto orexin neurons. However, several basic electrophysiological properties of  
10 orexin neurons were also found to be altered in the absence of orexin peptides, including  
11 hyperpolarized membrane potential, lower discharge rate and input resistance.  
12 Surprisingly, the capacitance of orexin neurons that lack orexin peptide was significantly  
13 larger than that of orexin neurons possessing orexin. This indicates that orexin neurons  
14 lacking orexin have a larger surface of cell membrane since capacitance reflects the  
15 surface area of the cytoplasmic membrane. We did not directly measure the difference in  
16 diameter of cell size since an approximately 3 pF increase is estimated to be associated  
17 with a 1-2  $\mu\text{m}$  increase in diameter as a spherical body. This might suggest that orexin  
18 signaling through either OX2R or glutamatergic excitatory inputs is involved in the  
19 regulation of cell size.

20 Orexin neurons are known to play an essential role in maintaining  
21 uninterrupted wakefulness as human narcolepsy patients show chronic daytime  
22 sleepiness (Crocker et al., 2005; Thannickal et al., 2000). Disruption of orexin signaling  
23 in mice, rats and dogs produce a very similar phenotype which includes short bouts of  
24 wakefulness and increased transitions of vigilance states (Chemelli et al., 1999;  
25 Mochizuki et al., 2004). These evidences suggest that orexin might be the key  
26 component released from the orexin neurons in performing the wake-maintaining role of



1 orexin neurons. Our study showed further evidence in support of this hypothesis in  
2 mouse model as putative increase in the probability of co-transmitters release from  
3 orexin neurons could not rescue from short bout and frequent state-transition  
4 phenomenon. Chemogenetic activation of orexin neurons prolonged duration of  
5 wakefulness only in the presence of orexin, suggesting that orexin is crucial to achieve  
6 long-duration wakefulness. Moreover, orexin administration can also make wakefulness  
7 with high cognitive ability in non-human primates (Deadwyler et al., 2007). Such effect of  
8 orexin is also expected in human society, and our results indicate the irreplaceability of  
9 orexin.

10           On the contrary, we found that other behavioral outcomes of activating orexin  
11 neurons, including increased wakefulness and decreased REM and NREM sleep, can  
12 be compensated for by co-transmitters. This effect was obvious especially during the  
13 dark (active) period when baseline activity of orexin neurons is presumably higher  
14 (Estabrooke et al., 2001; Lee et al., 2005; Mileykovskiy et al., 2005). Interestingly, some  
15 other behavioral effects, like the prevention of cataplexy, cannot be compensated for by  
16 co-transmitters. Rather, it deteriorates the condition. This might suggest that the role of  
17 orexin in the prevention of cataplexy is not simply to activate post-synaptic neurons since  
18 glutamate (co-transmitter) also activates post-synaptic neurons. Rather, neurons that  
19 are not directly innervated by orexin neurons might also be involved in the regulation of  
20 cataplexy. It is also possible that the released orexin diffuses in the CSF since  
21 intracerebroventricular injection of orexin inhibited cataplexy (Mieda et al., 2004).  
22 Moreover, orexin co-transmitter dynorphin, which inhibit orexin neurons both directly and  
23 indirectly by depressing glutamatergic afferent inputs to orexin neurons, might also play  
24 a key role in such deterioration of cataplexy (Li and van den Pol, 2006).

25           The release of orexin follows a circadian rhythm that is also strongly related to  
26 locomotion (Zhang et al., 2004). In rodents, the level of orexin peptide in the CSF is low

1 during the light period and high during the active-wake period (Zeitzer et al., 2003).  
2 Moreover, orexin neurons supposedly show higher activity during active wakefulness  
3 and become less active or inactive during REM or NREM sleep (Lee et al., 2005;  
4 Mileykovskiy et al., 2005). Our data also suggest that the activity of orexin neurons is  
5 differentially regulated during the light and dark periods. It is possible that the higher  
6 endogenous activity of orexin neurons during the dark period may facilitate  
7 CNO-induced transmitter release resulting in improved wakefulness in *OF(KI/KI)* mice.

8 In summary, here we dissociated the role of orexin at the cellular and  
9 behavioral level. We suggest that the primary function of orexin is to maintain the  
10 electrophysiological balance, the input-output functions in orexin neurons and most  
11 importantly, to exert the function of orexin neurons in maintaining sustained wakefulness.

1 **Funding:** This work was supported by CREST JST (JPMJCR1656 to A.Y.) and by  
2 KAKENHI grants (26293046, 26640041, 16H01271, 15H01428 to A.Y. and 26860157,  
3 26118507 to A.I., 15H02358 and 17H06312 to H.B. and 16H06276, 16H04650 to K.S.).  
4 This research was partially supported by the program for Brain Mapping by Integrated  
5 Neurotechnologies for Disease Studies (Brain/MINDS) from the Ministry of Education,  
6 Culture, Sports, Science, MEXT, and the Japan Agency for Medical Research and  
7 Development, AMED (to A.Y.).

8

9 **Acknowledgments :** We thank S. Tsukamoto, Y. Miyoshi, A. Inui, and G. Wang for  
10 technical assistance.

11

12 **Author contributions:** A.Y. conceived the idea; S.C. and A.Y. designed the  
13 experiments; S.C., C.J.H., S.I. and A.I. performed the experiments; S.C., C.J.H. and S.I.  
14 analyzed the data; M.K. generated the targeting vector; T.K. and H.B. generated dFRT  
15 vector; I.I. generated *FSF-mTFP1* mice; M.A. and K.S. generated *orexin-flippase* mice;  
16 S.C. and A.Y. wrote the manuscript.

17

18 **Financial disclosure statements:** None

## 1 **Methods**

### 2 **Subjects**

3 All experimental protocols in this study involving the use of mice were approved and  
4 were performed in accordance with the approved guidelines of the Institutional Animal  
5 Care and Use Committees of the Research Institute of Environmental Medicine, Nagoya  
6 University, Japan. Mice were group housed unless stated otherwise, on a 12-hour  
7 light-dark cycle (lights were turned on at 8:00 AM), with free access to food and water. All  
8 efforts were made to reduce the number of animals used and to minimize the suffering  
9 and pain of animals.

10

### 11 **Generation of *OF* knock-in mice**

12 To generate the *OF* knock-in mice, we designed a targeting vector in which Flp  
13 recombinase cDNA was fused to enhanced green fluorescent protein (EGFP) with the 2A  
14 peptide gene (EGFP-2A-Flp) and was placed just behind the translational initiation site of  
15 the prepro-orexin gene in-frame. The knock-in vector was constructed with the MC1  
16 promoter-driven diphtheria toxin gene, a 5.44 kb fragment at the 5' site. Flp recombinase,  
17 including a nuclear localization signal cDNA, was fused to EGFP with the T2A peptide  
18 sequence, a pgk-1 promoter-driven neomycin phosphotransferase gene (neo) flanked  
19 by two Dre recognition target (*rox*) sites, and a 5.16 kb fragment at the 3' site (Figure 1A).  
20 The sequence of EGFP-2A-Flp was codon-optimized for expression in mammalian cells.  
21 Linearized targeting vector was electroporated into embryonic stem cells from the  
22 C57BL/6 mouse line (RENKA), and corrected targeted clones were isolated by southern  
23 blotting. Two founders were obtained, and the B line was used in this study. PCR  
24 genotyping of mouse tail DNA was performed with the following primers: knock-in  
25 forward, 5'-CTCATTAGTACTCGGAACTGCCC-3'; knock-in reverse,  
26 5'-AAGCACTATCATGGCCTCAGTAGT-3'.

1

2 **Generation of *orexin-Flp*; *FSF-mTFP1*, *orexin-Flp*; *MCH-Cre* and *orexin-Flp*;**  
3 ***Gad67-Cre* bigenic mice**

4 After several generations of breeding, *OF* mice were separately bred with either  
5 *R26-CAG-FRT-STOP-FRT-mTFP1* (*FSF-mTFP1*) (Imayoshi et al., 2012), *MCH-Cre*  
6 (Kong et al., 2010), or glutamic acid decarboxylase at 67 K-dalton (*Gad67*)-*Cre*  
7 (*Gad67-Cre*) (Higo et al., 2009) mice to generate *orexin-Flp*; *FSF-mTFP1*, *orexin-Flp*;  
8 *MCH-Cre* or *orexin-Flp*; *Gad67-Cre* bigenic mice, respectively.

9

10 **Generation and microinjection of viral vectors**

11 Adeno-associated viral (AAV) vectors were produced using the AAV Helper-Free System  
12 (Agilent Technologies, Inc., Santa Clara, CA, USA). The virus purification method was  
13 modified from a previously published protocol (Inutsuka et al., 2016). Briefly, HEK293  
14 cells were transfected with a pAAV vector, pHelper and pAAV-RC (serotype 9 or DJ;  
15 purchased from Cell Biolabs Inc., San Diego, CA, USA) plasmid using a standard  
16 calcium phosphate method. Three days after transfection, cells were collected and  
17 suspended in artificial CSF (aCSF) solution (in mM: 124 NaCl, 3 KCl, 26 NaHCO<sub>3</sub>, 2  
18 CaCl<sub>2</sub>, 1 MgSO<sub>4</sub>, 1.25 KH<sub>2</sub>PO<sub>4</sub> and 10 glucose). Following multiple freeze-thaw cycles,  
19 the cell lysates were treated with benzonase nuclease (Merck, Darmstadt, Germany) at  
20 37°C for 30 min, and were centrifuged 2 times at 16,000 g for 10 min at 4°C. The  
21 supernatant was used as the virus-containing solution. Quantitative PCR was performed  
22 to measure the titer of purified virus. Virus aliquots were then stored at -80°C until use.

23 A dFRT cassette was used for Flp-dependent gene expression control. A dFRT cassette  
24 is composed of two different FRT sequences (FRT and F3) located in a cis position. In  
25 the presence of Flp, sequence between dFRT is reversed and fixed. To express hM3Dq  
26 exclusively in Flp-expressing neurons, we stereotactically injected 600 nl of

1 AAV(9)-CMV-dFRT-hM3Dq-mCherry (viral titer:  $1.0 \times 10^{12}$  particles/ml) virus into both  
2 brain hemispheres of *OF* mice using the following coordinates: -1.4 mm posterior to the  
3 bregma, 0.8 mm lateral to the midline, -5.0 mm ventral to the brain surface. Mice were  
4 anesthetized with 1.5-2.0% isoflurane (Wako Pure Chemical Industries, Osaka, Japan)  
5 using a Univentor 400 Anaesthesia Unit (Univentor Ltd., Malta) throughout the entire  
6 surgery. These mice were used in the behavioral experiments beginning at least 3 weeks  
7 post-injection. For Flp-dependent expression of humanized Renilla reniformis green  
8 fluorescent protein (hrGFP) and Cre-dependent expression of tdTomato, we  
9 stereotactically injected 600 nl of virus cocktail containing AAV(DJ)-CMV-dFRT-hrGFP  
10 (viral titer:  $3.7 \times 10^{12}$  particles/ml) and AAV(DJ)-CMV-FLEX-tdTomato (viral titer:  $2.0 \times 10^{12}$   
11 particles/ml) virus into one brain hemisphere of *OF* mice using the same coordinates  
12 described above.

13

#### 14 **Immunohistochemistry**

15 Mice were anesthetized with 10% somnopentyl (1.0 mg/kg, Kyoritsu Seiyaku  
16 Corporation, Tokyo, Japan) and were perfused transcardially with 20 ml of ice-cold  
17 saline. This perfusion was immediately followed by another 20 ml of 10% ice-cold  
18 formalin (Wako Pure Chemical Industries, Ltd., Osaka, Japan). Brains were then isolated  
19 and postfixed in 10% formalin solution at 4°C overnight. Subsequently, brains were  
20 immersed in 30% sucrose in PBS at 4°C for at least 2 days. Coronal brain slices of 40  $\mu$ m  
21 thickness were generated using a cryostat (Leica CM3050 S; Leica Microsystems,  
22 Wetzlar, Germany). For staining, coronal brain sections were immersed in blocking  
23 buffer (1% BSA and 0.25% Triton-X in PBS), then incubated with primary antibodies at  
24 4°C overnight. The sections were then washed with blocking buffer and incubated with  
25 secondary antibodies for 1 hr at room temperature (RT). After washing, brain sections  
26 were mounted and examined using a fluorescence microscope (BZ-9000, Keyence,

1 Osaka, Japan or IX71, Olympus, Tokyo, Japan).

2

### 3 **Antibodies and stains**

4 Primary antibodies were diluted in the blocking buffer as follows: anti-orexin-A goat  
5 antibody (Santa Cruz, Dallas, TX) at 1:1000, anti-MCH rabbit antibody (Sigma-Aldrich) at  
6 1:2000, anti-prodynorphin guinea pig antibody (Merck Millipore, Billerica, MA) at 1:100,  
7 anti-c-Fos rabbit antibody (Santa Cruz) at 1:500 and anti-GFP mouse antibody (Wako,  
8 Japan) at 1:1000. Secondary antibodies included: CF 488- or CF 594-conjugated  
9 anti-goat antibody (Biotium Inc., Hayward, CA), CF 647-conjugated anti-rabbit antibody  
10 (Biotium), CF 680-conjugated anti-guinea pig antibody (Biotium) and CF 488-conjugated  
11 anti-mouse antibody (Biotium); all were diluted at 1:1000 in blocking buffer.

12

### 13 **Acute brain slice preparations and electrophysiological recording**

14 OF and *orexin-EGFP (OE)* (Yamanaka et al., 2003) mice of both sexes, aged 2-5  
15 months, were used for electrophysiological recordings. Brain slice preparations and  
16 subsequent electrophysiological recording were modified from a previously published  
17 protocol (Chowdhury and Yamanaka, 2016). Briefly, mice were deeply anesthetized  
18 using isoflurane (Wako) and decapitated at around 11:00 AM. Brains were quickly  
19 isolated and chilled in ice-cold oxygenated (95% O<sub>2</sub> and 5% CO<sub>2</sub>) cutting solution (in mM:  
20 110 K-gluconate, 15 KCl, 0.05 EGTA, 5 HEPES, 26.2 NaHCO<sub>3</sub>, 25 Glucose, 3.3 MgCl<sub>2</sub>  
21 and 0.0015 (±)-3-(2-Carboxypiperazin-4-yl)propyl-1-phosphonic acid). After trimming the  
22 brain, coronal brain slices of 300 µm thickness that contained the LHA were generated  
23 using a vibratome (VT-1200S; Leica, Wetzlar, Germany) and were temporarily placed in  
24 an incubation chamber containing oxygenated bath solution (in mM: 124 NaCl, 3 KCl, 2  
25 MgCl<sub>2</sub>, 2 CaCl<sub>2</sub>, 1.23 NaH<sub>2</sub>PO<sub>4</sub>, 26 NaHCO<sub>3</sub> and 25 Glucose) in a 35°C water bath for 60  
26 min. Slices were then incubated at RT in the same incubation chamber for another 30-60

1 min for recovery.

2 Acute brain slices were transferred from the incubation chamber to a recording  
3 chamber (RC-26G; Warner Instruments, Hamden, CT, USA) equipped with an upright  
4 fluorescence microscope (BX51WI; Olympus, Tokyo, Japan), and were superfused with  
5 oxygenated bath solution at the rate of 1.5 ml/min using a peristaltic pump (Dynamax;  
6 Rainin, Oakland, CA, USA). An infrared camera (C3077-78; Hamamatsu Photonics,  
7 Hamamatsu, Japan) was installed in the fluorescence microscope along with an electron  
8 multiplying charge-coupled device camera (EMCCD, Evolve 512 delta; Photometrics,  
9 Tucson, AZ, USA) and both images were separately displayed on monitors.  
10 Micropipettes of 4-6 M $\Omega$  resistance were prepared from borosilicate glass capillaries  
11 (GC150-10; Harvard Apparatus, Cambridge, MA, USA) using a horizontal puller  
12 (P-1000; Sutter Instrument, Novato, CA, USA). Patch pipettes were filled with KCl-based  
13 internal solution (in mM: 145 KCl, 1 MgCl<sub>2</sub>, 10 HEPES, 1.1 EGTA, 2 MgATP, 0.5 Na<sub>2</sub>GTP;  
14 pH 7.3 with KOH) with osmolality between 280-290 mOsm. Positive pressure was  
15 introduced in the patch pipette as it approached the cell. For whole-cell current clamp or  
16 voltage clamp recordings, a giga-seal of resistance >1 G $\Omega$  was made between the patch  
17 pipette and the cell membrane by releasing the positive pressure upon contacting the  
18 cell. The patch membrane was then ruptured by gentle suction to form a whole-cell  
19 configuration. Electrophysiological properties of the cells were monitored using the  
20 Axopatch 200B amplifier (Axon Instrument, Molecular Devices, Sunnyvale, CA). Output  
21 signals were low-pass filtered at 5 kHz and digitized at a 10 kHz sampling rate. Patch  
22 clamp data were recorded through an analog-to-digital (AD) converter (Digidata 1550A;  
23 Molecular Devices) using pClamp 10.2 software (Molecular Devices). Blue light with a  
24 wavelength of 475  $\pm$  17.5 nm was generated by a light source that used a light-emitting  
25 diode (Spectra light engine; Lumencor, Beaverton, OR, USA) and was guided to the  
26 microscope stage with a 1.0 cm diameter fiber. Brain slices were illuminated through the



1 objective lens of the fluorescence microscope. EGFP-expressing orexin neurons were  
2 identified by its fluorescence. For cell-attached recording, a seal of resistance  $<1\text{ G}\Omega$   
3 was made and spontaneous firing was recorded. The resting membrane potentials  
4 ( $V_{\text{rest}}$ ) were measured from offline analysis of current clamp recordings using the  
5 predefined fitting function provided by Clampfit. We performed standard exponential  
6 fitting with zero shift for the initial 20 s of data to measure the  $V_{\text{rest}}$  of recorded neurons.  
7 Firing frequency was also calculated from offline analysis of the initial 60 s of the  
8 cell-attached recording data. sEPSCs were recorded with picrotoxin ( $400\text{ }\mu\text{M}$ ) and  
9 sIPSCs were recorded with AP-5 ( $50\text{ }\mu\text{M}$ ) and CNQX ( $20\text{ }\mu\text{M}$ ) in bath solutions. Both  
10 sEPSCs and sIPSCs were recorded in the presence of KCl-based pipette solutions that  
11 included  $1\text{ mM}$  of QX-314.

12

### 13 **EEG-EMG surgery, data acquisition, and vigilance state determination**

14 Virus injected age-matched male mice were implanted with EEG and EMG electrodes for  
15 polysomnographic recording under isoflurane anesthesia following the protocol  
16 published elsewhere (Tabuchi et al., 2014a). Immediately after surgery, each mouse  
17 received an i.p. injection of  $10\text{ ml/kg}$  of analgesic solution containing  $0.5\text{ mg/ml}$  of  
18 Carprofen (Zoetis Inc., Japan). The same analgesic at the same dose was administered  
19 again 1 day after surgery. Mice were singly housed for 7 days during recovery. Mice were  
20 then connected to a cable with a slip ring in order to move freely in the cage and were  
21 habituated with the cable for another 7 days. The first 3 days were treated as the  
22 adaptation period for the animals to acclimate to the new environment and to  
23 intraperitoneal (i.p.) administration ( $10\text{ ml/kg}$ ) of saline. On days 4 and 5, the mice were  
24 injected with saline (day 4) and CNO (Enzo Life Sciences, Farmingdale, NY, USA) (day  
25 5) at 10:00 AM during the light period. On days 7 and 8, they were injected with saline  
26 (day 7) and CNO (day 8) at 10:00 PM during the dark period (See Figure 6). CNO was

1 dissolved in water to make a stock solution (10 mg/ml) and was diluted with saline to a  
2 final concentration of 100 µg/ml just prior to i.p. administration.  
3 EEG and EMG signals were amplified (AB-610J, Nihon Koden, Japan), filtered (EEG  
4 1.5-30 Hz and EMG 15-300 Hz), digitized (at a sampling rate of 128 Hz), recorded (Vital  
5 Recorder, Kissei Comtec Co., Ltd, Japan) and finally analyzed (SleepSign, Kissei  
6 Comtec). Animal behavior was monitored through a CCD video camera (Amaki Electric  
7 Co., Ltd., Japan) during both the light and dark periods. The dark period video recording  
8 was assisted by infrared photography (Amaki Electric Co., Ltd., Japan) and an infrared  
9 sensor (Kissei Comtec). EEG and EMG data were automatically scored in 4 sec epochs  
10 and classified as wake, rapid eye movement sleep, and non-rapid eye movement sleep.  
11 The EEG analysis yielded power spectra profiles over a 0~20 Hz window with 1 Hz  
12 resolution for delta (1-5 Hz), theta (6-10 Hz), alpha (11-15 Hz), and beta (16-20 Hz)  
13 bandwidths. All auto-screened data were examined visually and corrected. The criteria  
14 for vigilance states were the same as described previously (Tabuchi et al., 2014b). Briefly,  
15 (i) wake (low EEG amplitude with high EMG or locomotion score), (ii) non-rapid eye  
16 movement (NREM) sleep (low EMG and high EEG delta amplitude), and (iii) rapid eye  
17 movement (REM) sleep (low EMG, low EEG amplitude with high theta activity, and  
18 should be followed by NREM). Cataplexy was tracked using a combination of multiple  
19 criteria: muscle atonia lasting  $\geq 10$  sec, predominance of theta activity and more than 40  
20 seconds of wakefulness before the cataplectic attack.

21

## 22 **Data analysis and presentation**

23 Immunostaining data were analyzed and processed with ImageJ (US National Institute  
24 of Health) and BZ-X Analyzer (Keyence BZ-X710 microscope). Electrophysiological  
25 analysis was performed with either Clampfit10 (Molecular Devices, Sunnyvale, CA) or  
26 Minianalysis software (Synaptosoft Inc., Decatur, GA). Electrophysiological data were

1 saved as American Standard Code for Information Interchange (ASCII) files and further  
2 data calculations were performed in Microsoft Excel. Graphs were generated in Origin  
3 2017 (OriginLab, Northampton, MA) using data from Excel. Statistical analysis was also  
4 performed with Origin 2017. Graphs were generated using Canvas 15 (ACD Systems,  
5 Seattle, WA).

6

### 7 **Experimental design and statistical analysis**

8 The electrophysiological effects of knocking out a single neuropeptide in its source  
9 neurons were analyzed by slice electrophysiology. Individual sample sizes for slice  
10 patch-clamp recordings (n number of neurons) are reported separately for each  
11 experiment. The physiological effects of activating orexin neurons that lack orexin  
12 neuropeptide were also analyzed. In all cases, five or more animals were used for each  
13 parameter tested. All statistical tests, including the exact  $p$  values, are described when  
14 used. No statistical analyses were used to predetermine sample sizes. All data are  
15 presented as the mean  $\pm$  standard error of the mean (SEM). For all statistical tests \*  
16  $p < 0.05$ , \*\*  $p < 0.01$ , \*\*\*  $p < 0.001$  were considered significant and  $p > 0.05$  was considered  
17 not significant (ns).

1 **References:**

- 2 Adamantidis, A.R., Zhang, F., Aravanis, A.M., Deisseroth, K., and de Lecea, L.  
3 (2007). Neural substrates of awakening probed with optogenetic control of  
4 hypocretin neurons. *Nature* 450, 420-424.
- 5 Armbruster, B.N., Li, X., Pausch, M.H., Herlitze, S., and Roth, B.L. (2007).  
6 Evolving the lock to fit the key to create a family of G protein-coupled receptors  
7 potently activated by an inert ligand. *Proc Natl Acad Sci U S A* 104, 5163-5168.
- 8 Broberger, C., De Lecea, L., Sutcliffe, J.G., and Hokfelt, T. (1998).  
9 Hypocretin/orexin- and melanin-concentrating hormone-expressing cells form  
10 distinct populations in the rodent lateral hypothalamus: relationship to the  
11 neuropeptide Y and agouti gene-related protein systems. *J Comp Neurol* 402,  
12 460-474.
- 13 Chemelli, R.M., Willie, J.T., Sinton, C.M., Elmquist, J.K., Scammell, T., Lee, C.,  
14 Richardson, J.A., Williams, S.C., Xiong, Y., Kisanuki, Y., *et al.* (1999). Narcolepsy  
15 in orexin knockout mice: molecular genetics of sleep regulation. *Cell* 98, 437-451.
- 16 Chou, T.C., Lee, C.E., Lu, J., Elmquist, J.K., Hara, J., Willie, J.T., Beuckmann,  
17 C.T., Chemelli, R.M., Sakurai, T., Yanagisawa, M., *et al.* (2001). Orexin  
18 (hypocretin) neurons contain dynorphin. *J Neurosci* 21, RC168.
- 19 Chowdhury, S., and Yamanaka, A. (2016). Optogenetic activation of serotonergic  
20 terminals facilitates GABAergic inhibitory input to orexin/hypocretin neurons.  
21 *Scientific reports* 6, 36039.
- 22 Crocker, A., Espana, R.A., Papadopoulou, M., Saper, C.B., Faraco, J., Sakurai,  
23 T., Honda, M., Mignot, E., and Scammell, T.E. (2005). Concomitant loss of  
24 dynorphin, NARP, and orexin in narcolepsy. *Neurology* 65, 1184-1188.
- 25 de Lecea, L., Kilduff, T.S., Peyron, C., Gao, X., Foye, P.E., Danielson, P.E.,  
26 Fukuhara, C., Battenberg, E.L., Gautvik, V.T., Bartlett, F.S., 2nd, *et al.* (1998). The  
27 hypocretins: hypothalamus-specific peptides with neuroexcitatory activity. *Proc*  
28 *Natl Acad Sci U S A* 95, 322-327.
- 29 Deadwyler, S.A., Porrino, L., Siegel, J.M., and Hampson, R.E. (2007). Systemic  
30 and nasal delivery of orexin-A (Hypocretin-1) reduces the effects of sleep  
31 deprivation on cognitive performance in nonhuman primates. *J Neurosci* 27,  
32 14239-14247.

- 1 Estabrooke, I.V., McCarthy, M.T., Ko, E., Chou, T.C., Chemelli, R.M.,  
2 Yanagisawa, M., Saper, C.B., and Scammell, T.E. (2001). Fos expression in  
3 orexin neurons varies with behavioral state. *The Journal of neuroscience : the*  
4 *official journal of the Society for Neuroscience* *21*, 1656-1662.
- 5 Hakansson, M., de Lecea, L., Sutcliffe, J.G., Yanagisawa, M., and Meister, B.  
6 (1999). Leptin receptor- and STAT3-immunoreactivities in hypocretin/orexin  
7 neurones of the lateral hypothalamus. *J Neuroendocrinol* *11*, 653-663.
- 8 Higo, S., Akashi, K., Sakimura, K., and Tamamaki, N. (2009). Subtypes of  
9 GABAergic neurons project axons in the neocortex. *Front Neuroanat* *3*, 25.
- 10 Imayoshi, I., Hirano, K., Sakamoto, M., Miyoshi, G., Imura, T., Kitano, S., Miyachi,  
11 H., and Kageyama, R. (2012). A multifunctional teal-fluorescent Rosa26 reporter  
12 mouse line for Cre- and Flp-mediated recombination. *Neurosci Res* *73*, 85-91.
- 13 Inutsuka, A., Inui, A., Tabuchi, S., Tsunematsu, T., Lazarus, M., and Yamanaka,  
14 A. (2014). Concurrent and robust regulation of feeding behaviors and metabolism  
15 by orexin neurons. *Neuropharmacology* *85*, 451-460.
- 16 Inutsuka, A., and Yamanaka, A. (2013). The physiological role of  
17 orexin/hypocretin neurons in the regulation of sleep/wakefulness and  
18 neuroendocrine functions. *Frontiers in endocrinology* *4*.
- 19 Inutsuka, A., Yamashita, A., Chowdhury, S., Nakai, J., Ohkura, M., Taguchi, T.,  
20 and Yamanaka, A. (2016). The integrative role of orexin/hypocretin neurons in  
21 nociceptive perception and analgesic regulation. *Scientific reports* *6*, 29480.
- 22 Kong, D., Vong, L., Parton, L.E., Ye, C., Tong, Q., Hu, X., Choi, B., Bruning, J.C.,  
23 and Lowell, B.B. (2010). Glucose stimulation of hypothalamic MCH neurons  
24 involves K(ATP) channels, is modulated by UCP2, and regulates peripheral  
25 glucose homeostasis. *Cell Metab* *12*, 545-552.
- 26 Lee, M.G., Hassani, O.K., and Jones, B.E. (2005). Discharge of identified  
27 orexin/hypocretin neurons across the sleep-waking cycle. *J Neurosci* *25*,  
28 6716-6720.
- 29 Li, Y., and van den Pol, A.N. (2006). Differential target-dependent actions of  
30 coexpressed inhibitory dynorphin and excitatory hypocretin/orexin  
31 neuropeptides. *J Neurosci* *26*, 13037-13047.
- 32 Lin, L., Faraco, J., Li, R., Kadotani, H., Rogers, W., Lin, X., Qiu, X., de Jong, P.J.,  
33 Nishino, S., and Mignot, E. (1999). The sleep disorder canine narcolepsy is

1 caused by a mutation in the hypocretin (orexin) receptor 2 gene. *Cell* **98**,  
2 365-376.

3 Mieda, M., Willie, J.T., Hara, J., Sinton, C.M., Sakurai, T., and Yanagisawa, M.  
4 (2004). Orexin peptides prevent cataplexy and improve wakefulness in an orexin  
5 neuron-ablated model of narcolepsy in mice. *Proc Natl Acad Sci U S A* **101**,  
6 4649-4654.

7 Mileykovskiy, B.Y., Kiyashchenko, L.I., and Siegel, J.M. (2005). Behavioral  
8 correlates of activity in identified hypocretin/orexin neurons. *Neuron* **46**, 787-798.

9 Mochizuki, T., Crocker, A., McCormack, S., Yanagisawa, M., Sakurai, T., and  
10 Scammell, T.E. (2004). Behavioral state instability in orexin knock-out mice. *J*  
11 *Neurosci* **24**, 6291-6300.

12 Nambu, T., Sakurai, T., Mizukami, K., Hosoya, Y., Yanagisawa, M., and Goto, K.  
13 (1999). Distribution of orexin neurons in the adult rat brain. *Brain Res* **827**,  
14 243-260.

15 Peyron, C., Faraco, J., Rogers, W., Ripley, B., Overeem, S., Charnay, Y.,  
16 Nevsimalova, S., Aldrich, M., Reynolds, D., Albin, R., *et al.* (2000). A mutation in a  
17 case of early onset narcolepsy and a generalized absence of hypocretin peptides  
18 in human narcoleptic brains. *Nat Med* **6**, 991-997.

19 Peyron, C., Tighe, D.K., van den Pol, A.N., de Lecea, L., Heller, H.C., Sutcliffe,  
20 J.G., and Kilduff, T.S. (1998). Neurons containing hypocretin (orexin) project to  
21 multiple neuronal systems. *J Neurosci* **18**, 9996-10015.

22 Rosin, D.L., Weston, M.C., Sevigny, C.P., Stornetta, R.L., and Guyenet, P.G.  
23 (2003). Hypothalamic orexin (hypocretin) neurons express vesicular glutamate  
24 transporters VGLUT1 or VGLUT2. *J Comp Neurol* **465**, 593-603.

25 Sakurai, T. (2014). The role of orexin in motivated behaviours. *Nature Reviews*  
26 *Neuroscience* **15**, 719.

27 Sakurai, T., Amemiya, A., Ishii, M., Matsuzaki, I., Chemelli, R.M., Tanaka, H.,  
28 Williams, S.C., Richardson, J.A., Kozlowski, G.P., Wilson, S., *et al.* (1998).  
29 Orexins and orexin receptors: a family of hypothalamic neuropeptides and G  
30 protein-coupled receptors that regulate feeding behavior. *Cell* **92**, 573-585.

31 Sakurai, T., Moriguchi, T., Furuya, K., Kajiwara, N., Nakamura, T., Yanagisawa,  
32 M., and Goto, K. (1999). Structure and function of human prepro-orexin gene. *J*  
33 *Biol Chem* **274**, 17771-17776.

- 1 Sakurai, T., Nagata, R., Yamanaka, A., Kawamura, H., Tsujino, N., Muraki, Y.,  
2 Kageyama, H., Kunita, S., Takahashi, S., Goto, K., *et al.* (2005). Input of  
3 orexin/hypocretin neurons revealed by a genetically encoded tracer in mice.  
4 *Neuron* 46, 297-308.
- 5 Sasaki, K., Suzuki, M., Mieda, M., Tsujino, N., Roth, B., and Sakurai, T. (2011).  
6 Pharmacogenetic modulation of orexin neurons alters sleep/wakefulness states  
7 in mice. *PLoS One* 6, e20360.
- 8 Tabuchi, S., Tsunematsu, T., Black, S.W., Tominaga, M., Maruyama, M., Takagi,  
9 K., Minokoshi, Y., Sakurai, T., Kilduff, T.S., and Yamanaka, A. (2014a).  
10 Conditional Ablation of Orexin/Hypocretin Neurons: A New Mouse Model for the  
11 Study of Narcolepsy and Orexin System Function. *The Journal of Neuroscience*  
12 34, 6495-6509.
- 13 Tabuchi, S., Tsunematsu, T., Black, S.W., Tominaga, M., Maruyama, M., Takagi,  
14 K., Minokoshi, Y., Sakurai, T., Kilduff, T.S., and Yamanaka, A. (2014b).  
15 Conditional ablation of orexin/hypocretin neurons: a new mouse model for the  
16 study of narcolepsy and orexin system function. *The Journal of neuroscience :*  
17 *the official journal of the Society for Neuroscience* 34, 6495-6509.
- 18 Tabuchi, S., Tsunematsu, T., Kilduff, T.S., Sugio, S., Xu, M., Tanaka, K.F.,  
19 Takahashi, S., Tominaga, M., and Yamanaka, A. (2013). Influence of inhibitory  
20 serotonergic inputs to orexin/hypocretin neurons on the diurnal rhythm of sleep  
21 and wakefulness. *Sleep* 36, 1391-1404.
- 22 Thannickal, T.C., Moore, R.Y., Nienhuis, R., Ramanathan, L., Gulyani, S., Aldrich,  
23 M., Cornford, M., and Siegel, J.M. (2000). Reduced number of hypocretin  
24 neurons in human narcolepsy. *Neuron* 27, 469-474.
- 25 Tsunematsu, T., Kilduff, T.S., Boyden, E.S., Takahashi, S., Tominaga, M., and  
26 Yamanaka, A. (2011). Acute Optogenetic Silencing of Orexin/Hypocretin Neurons  
27 Induces Slow-Wave Sleep in Mice. *J Neurosci* 31, 10529-10539.
- 28 Tupone, D., Madden, C.J., Cano, G., and Morrison, S.F. (2011). An orexinergic  
29 projection from perifornical hypothalamus to raphe pallidus increases rat brown  
30 adipose tissue thermogenesis. *J Neurosci* 31, 15944-15955.
- 31 Yamanaka, A., Beuckmann, C.T., Willie, J.T., Hara, J., Tsujino, N., Mieda, M.,  
32 Tominaga, M., Yagami, K., Sugiyama, F., Goto, K., *et al.* (2003). Hypothalamic  
33 orexin neurons regulate arousal according to energy balance in mice. *Neuron* 38,

1 701-713.  
2 Yamanaka, A., Tabuchi, S., Tsunematsu, T., Fukazawa, Y., and Tominaga, M.  
3 (2010a). Orexin directly excites orexin neurons through orexin 2 receptor. *J*  
4 *Neurosci* *30*, 12642-12652.  
5 Yamanaka, A., Tabuchi, S., Tsunematsu, T., Fukazawa, Y., and Tominaga, M.  
6 (2010b). Orexin Directly Excites Orexin Neurons through Orexin 2 Receptor. *The*  
7 *Journal of Neuroscience* *30*, 12642-12652.  
8 Yoshida, K., McCormack, S., Espana, R.A., Crocker, A., and Scammell, T.E.  
9 (2006). Afferents to the orexin neurons of the rat brain. *J Comp Neurol* *494*,  
10 845-861.  
11 Zeitzer, J.M., Buckmaster, C.L., Parker, K.J., Hauck, C.M., Lyons, D.M., and  
12 Mignot, E. (2003). Circadian and homeostatic regulation of hypocretin in a  
13 primate model: implications for the consolidation of wakefulness. *J Neurosci* *23*,  
14 3555-3560.  
15 Zhang, S., Zeitzer, J.M., Yoshida, Y., Wisor, J.P., Nishino, S., Edgar, D.M., and  
16 Mignot, E. (2004). Lesions of the suprachiasmatic nucleus eliminate the daily  
17 rhythm of hypocretin-1 release. *Sleep* *27*, 619-627.  
18 Zhang, W., Sakurai, T., Fukuda, Y., and Kuwaki, T. (2006). Orexin  
19 neuron-mediated skeletal muscle vasodilation and shift of baroreflex during  
20 defense response in mice. *Am J Physiol Regul Integr Comp Physiol* *290*,  
21 R1654-1663.

22



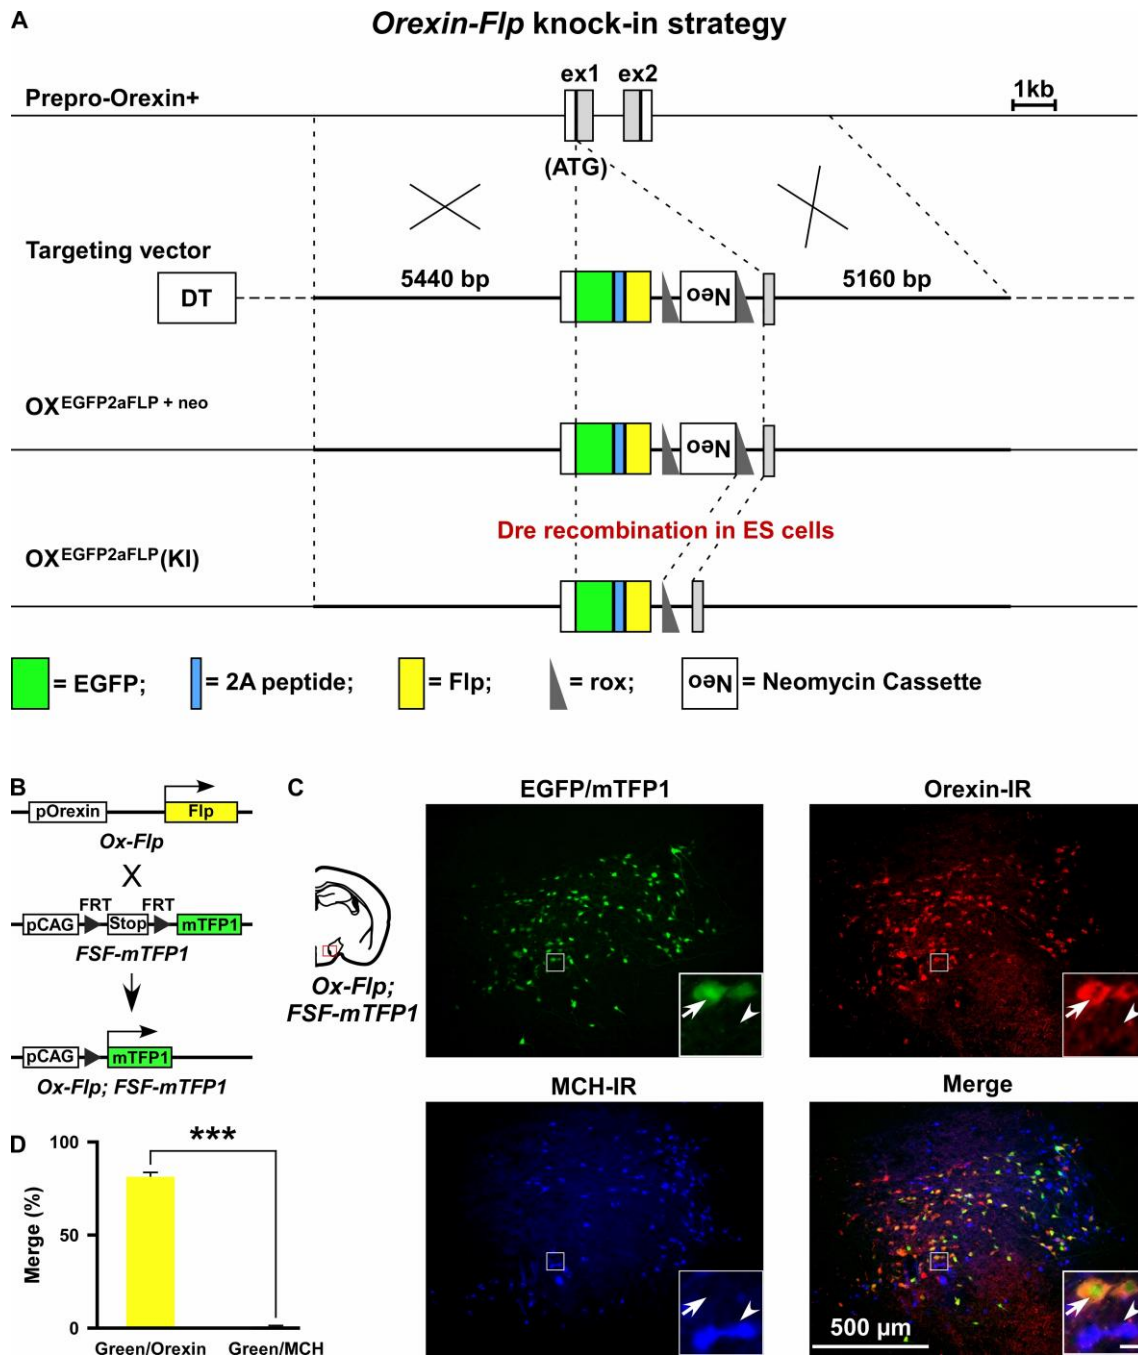

**Figure 1:** Generation of *OF* mice. A, Schematic representations of the prepro-orexin gene, targeting vector, and targeted gene. To achieve orexin neuron-specific expression of Flp recombinase, we inserted EGFP-2A-Flp just behind the translation initiation site of the prepro-orexin gene in-frame. Viral T2A peptide is cleaved just after translation, and EGFP and Flp recombinase localize independently. DT, diphtheria toxin; Neo, neomycin-resistant gene expression cassette. B, Structure of the reporter gene in the presence of Flp. *Orexin-Flp; FSF-mTFP1* bigenic mice were generated to express

1 mTFP1 in orexin neurons. C) Representative pictures from coronal brain sections of  
2 *orexin-Flp; FSF-mTFP1* bigenic mice. Arrow indicates mTFP1 and/or EGFP expressing  
3 orexin neurons and the arrowhead indicates the position of the MCH neuron. Inset scale  
4 bar: 20  $\mu$ m. D) Summary of the co-expression analysis (n = 4 mice). The *p* values were  
5 measured by two-tailed paired student's *t*-test. Data represent the mean  $\pm$  SEM.

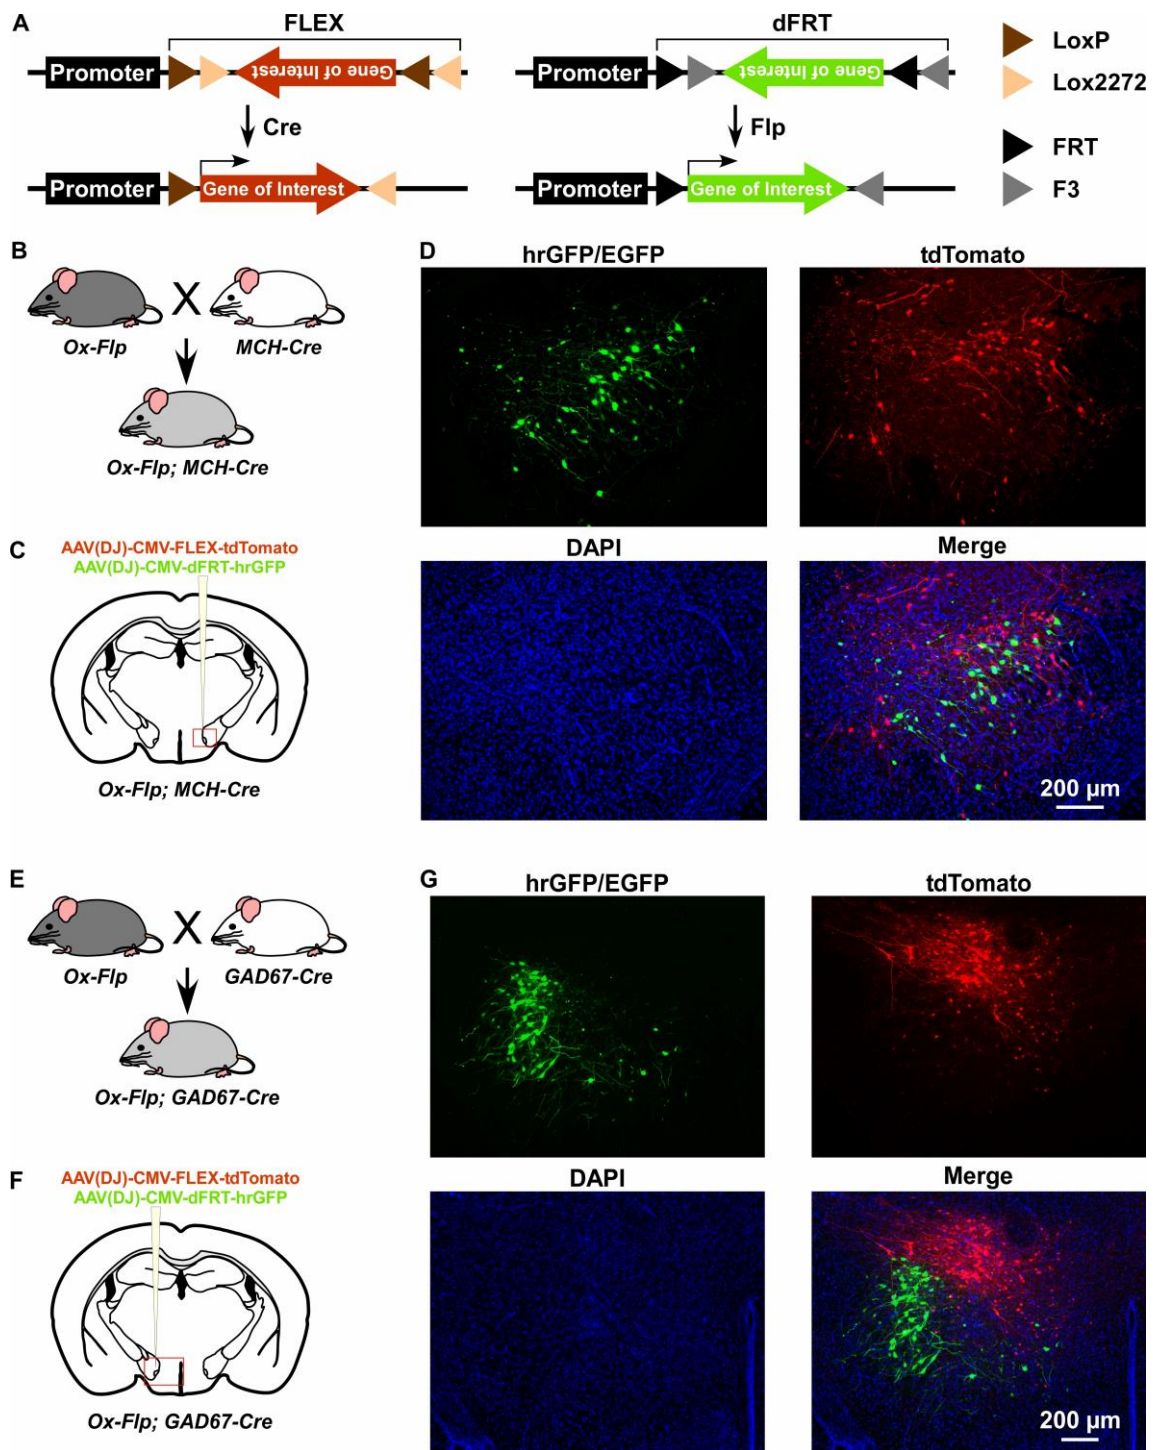

1

2 **Figure 2:** Gene expression control using *OF* mice to target different cell types within the  
 3 same brain region. A, Schematic showing Cre (left) and Flp (right)  
 4 recombinase-dependent gene expression control. B and E, The breeding scheme for  
 5 *orexin-Flp; MCH-Cre* and *orexin-Flp; Gad67-Cre* bigenic mice, respectively. C and F,  
 6 Schematic drawings showing micro-injection of the AAV cocktail into the LHA of bigenic

- 1 mice. D and G, Representative coronal brain sections showing the segregated
- 2 expression of tdTomato and hrGFP in a Cre and Flp recombinase-dependent manner,
- 3 respectively.

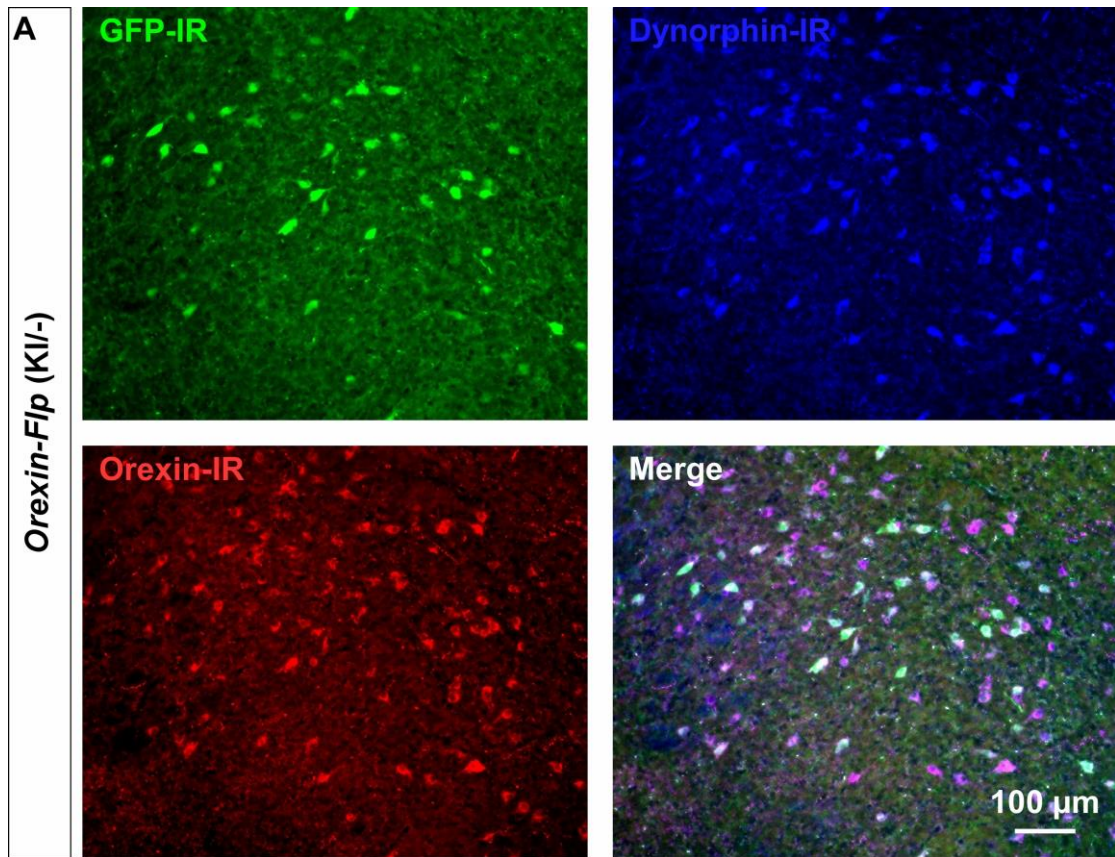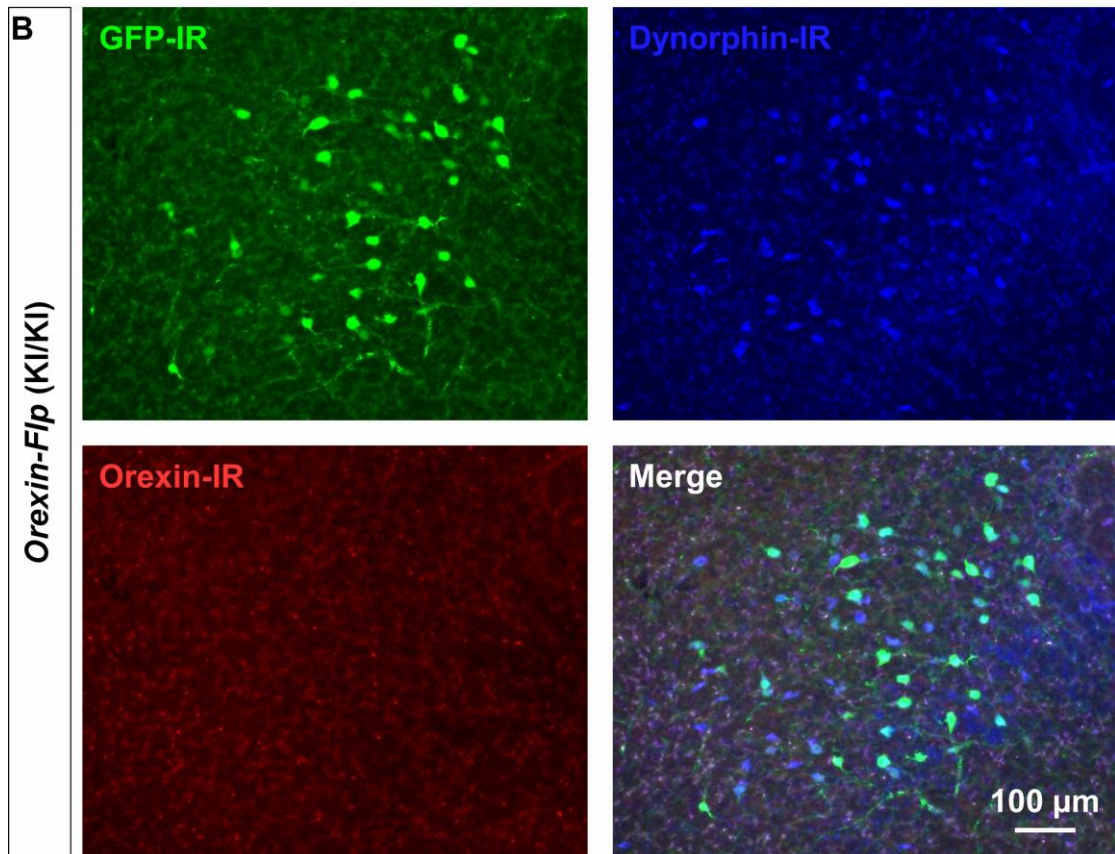

- 1 **Figure 3:** Immunohistochemical confirmation of *OF* mice. A and B, Representative
- 2 coronal brain sections showing the expression of EGFP (green), orexin (red) and
- 3 dynorphin (blue).

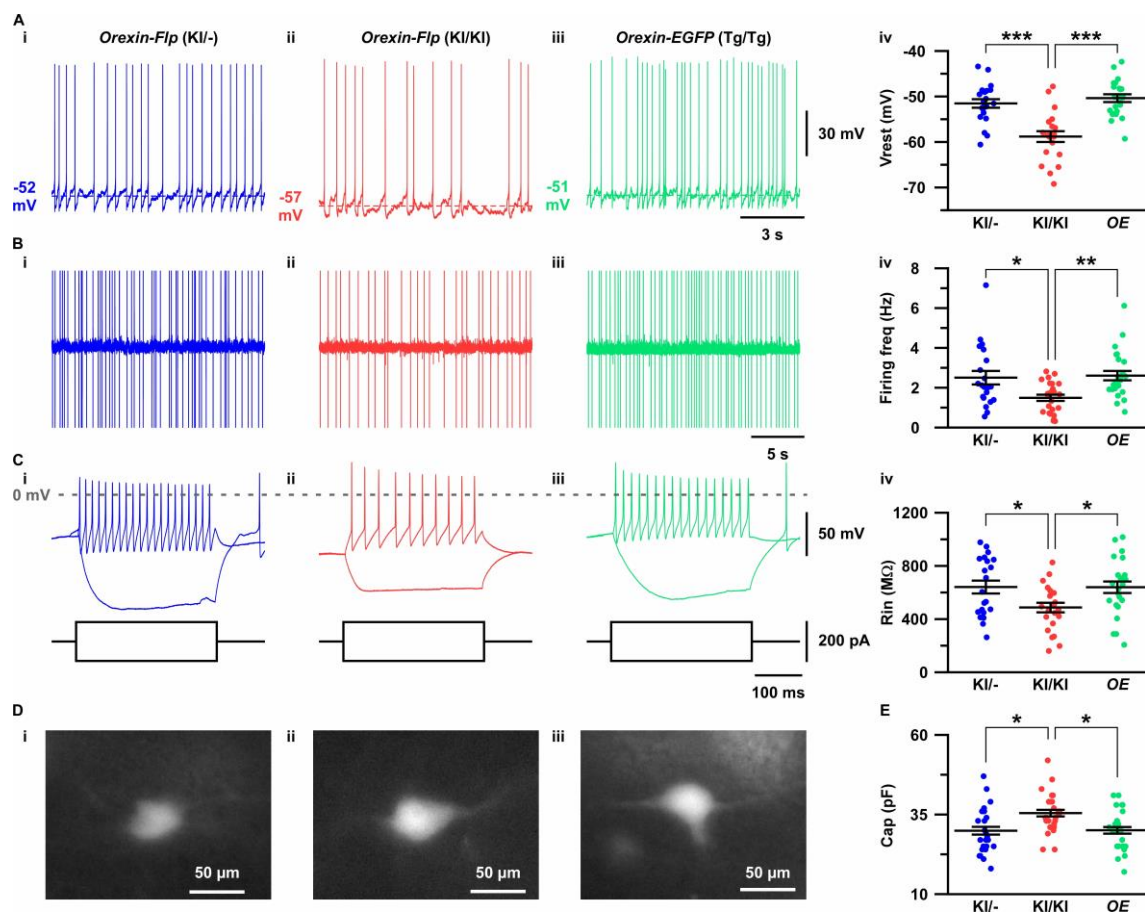

1  
2  
3  
4  
5  
6  
7  
8  
9  
10

**Figure 4:** Electrophysiological properties of orexin neurons with/without orexin. A-C show representative traces recorded from *OF (KI/-)* (i), *OF (KI/KI)* (ii) and *OE* (iii) mice. A, Membrane potential in whole-cell current clamp recordings. B, Spontaneous firing in cell-attached recordings. C, Step current injection-induced membrane potential changes. Panel iv is a summary of the data in panel i to iii. D, Representative images showing EGFP expression in acute coronal brain slices during electrophysiological recording. E, Cell capacitance from whole-cell current clamp recording. The  $p$  values were determined using one-way ANOVA test followed by a post-hoc Tukey analysis. Data represent the mean  $\pm$  SEM.

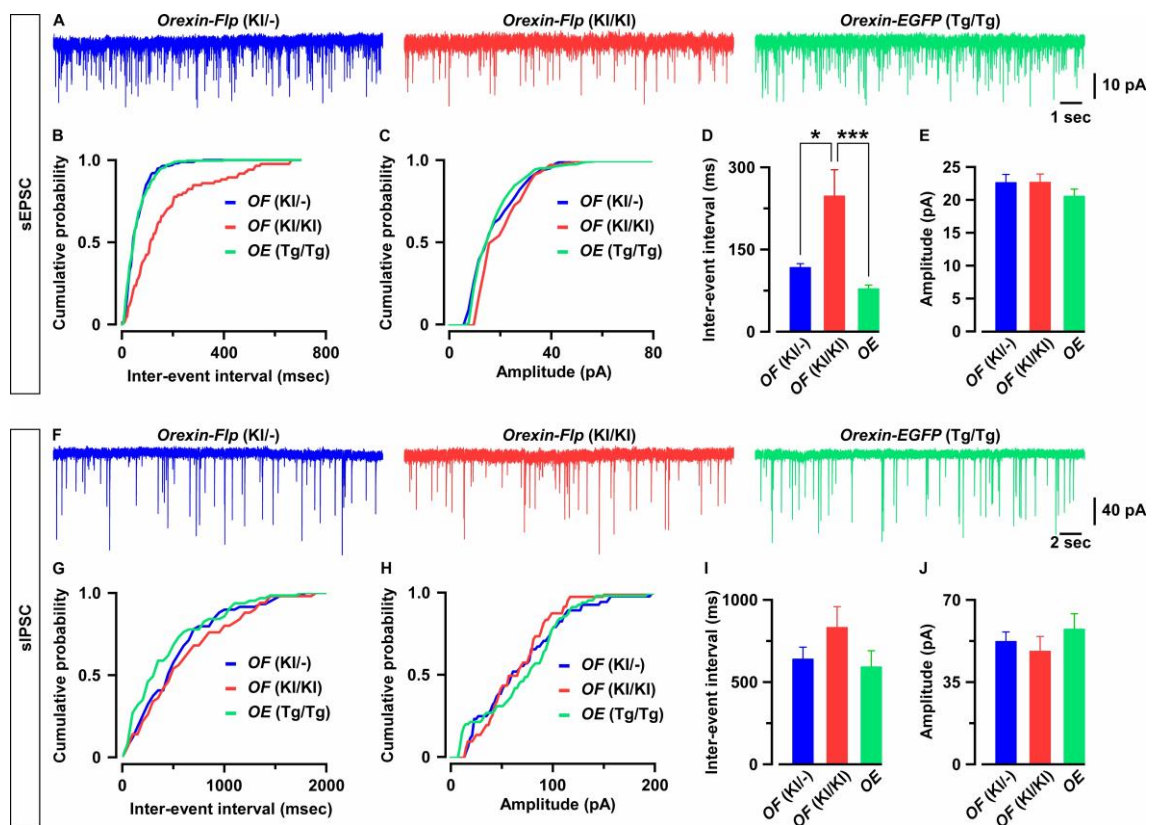

1  
2 **Figure 5:** Orexin neurons receive fewer glutamatergic inputs in the absence of orexin. A,  
3 Representative sEPSC traces recorded from EGFP-expressing neurons at a holding  
4 potential of -60 mV. B-C, Cumulative probability plot for the representative traces shown  
5 in A. Bar diagrams in D and E summarize the sEPSC data. D, Inter-event interval. E,  
6 amplitude (n = 25-29). F, Representative sIPSC traces recorded from EGFP-expressing  
7 neurons at a holding potential of -60 mV. G-H, Cumulative probability plot for the  
8 representative traces shown in F. Bar diagrams in I and J summarize the sIPSC data. G,  
9 Inter-event interval. H, amplitude (n = 17-22). The p values were calculated by one-way  
10 ANOVA followed by a post-hoc Tukey test. Data represent the mean  $\pm$  SEM.



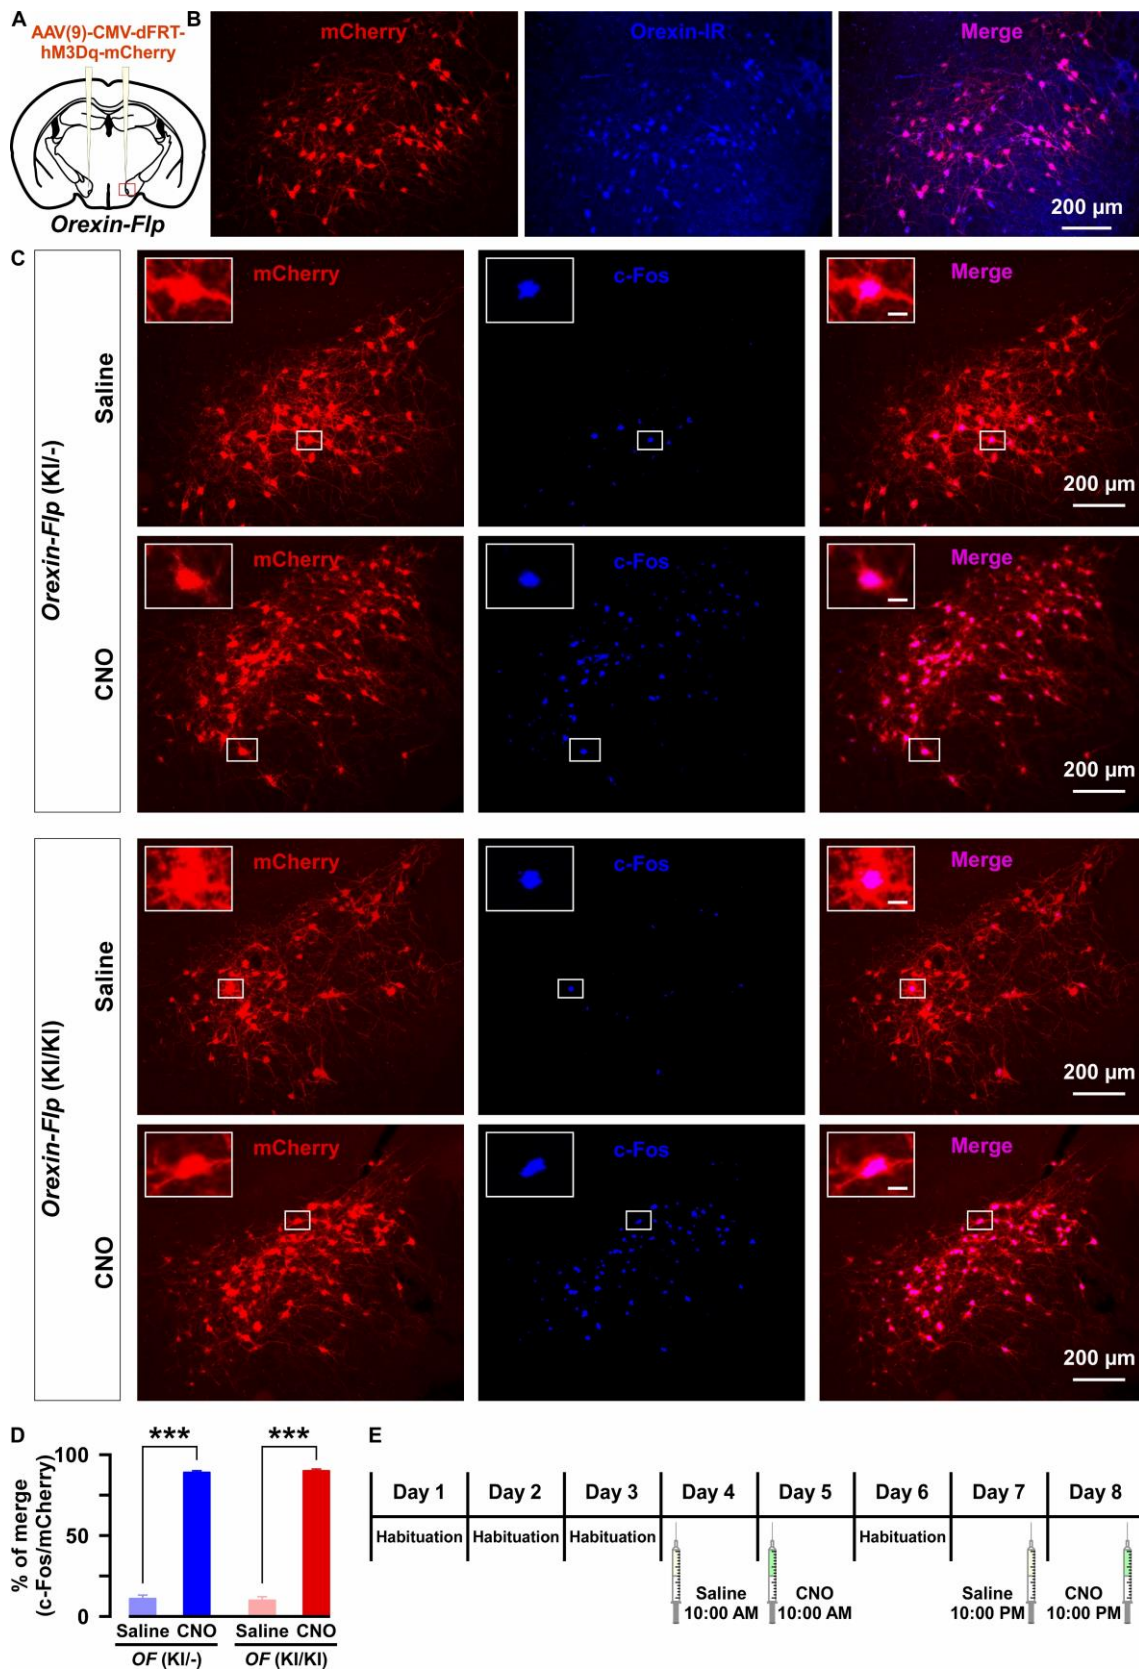

1

2 **Figure 6:** Selective chemogenetic activation of orexin neurons. A, Intracranial injection

1 of AAV in *OF* mice to achieve Flp-dependent expression of hM3Dq-mCherry fusion  
2 protein in orexin neurons. B, Representative images showing the expression of mCherry  
3 in orexin-immunoreactive neurons in heterozygous *OF* (KI/-) mice. C, c-Fos expression  
4 after i.p. administration of either saline or CNO in both *OF* (KI/-) and *OF* (KI/KI) mice. D,  
5 Summary of the immunostaining data shown in C. CNO administration can significantly  
6 increase neuronal activity in both heterozygous and homozygous mice (n = 3 mice per  
7 group). E, Schematic showing the schedule of i.p. administration during sleep recording.  
8 The *p* values were determined by a two-tailed student's *t*-test; data represent the mean ±  
9 SEM.

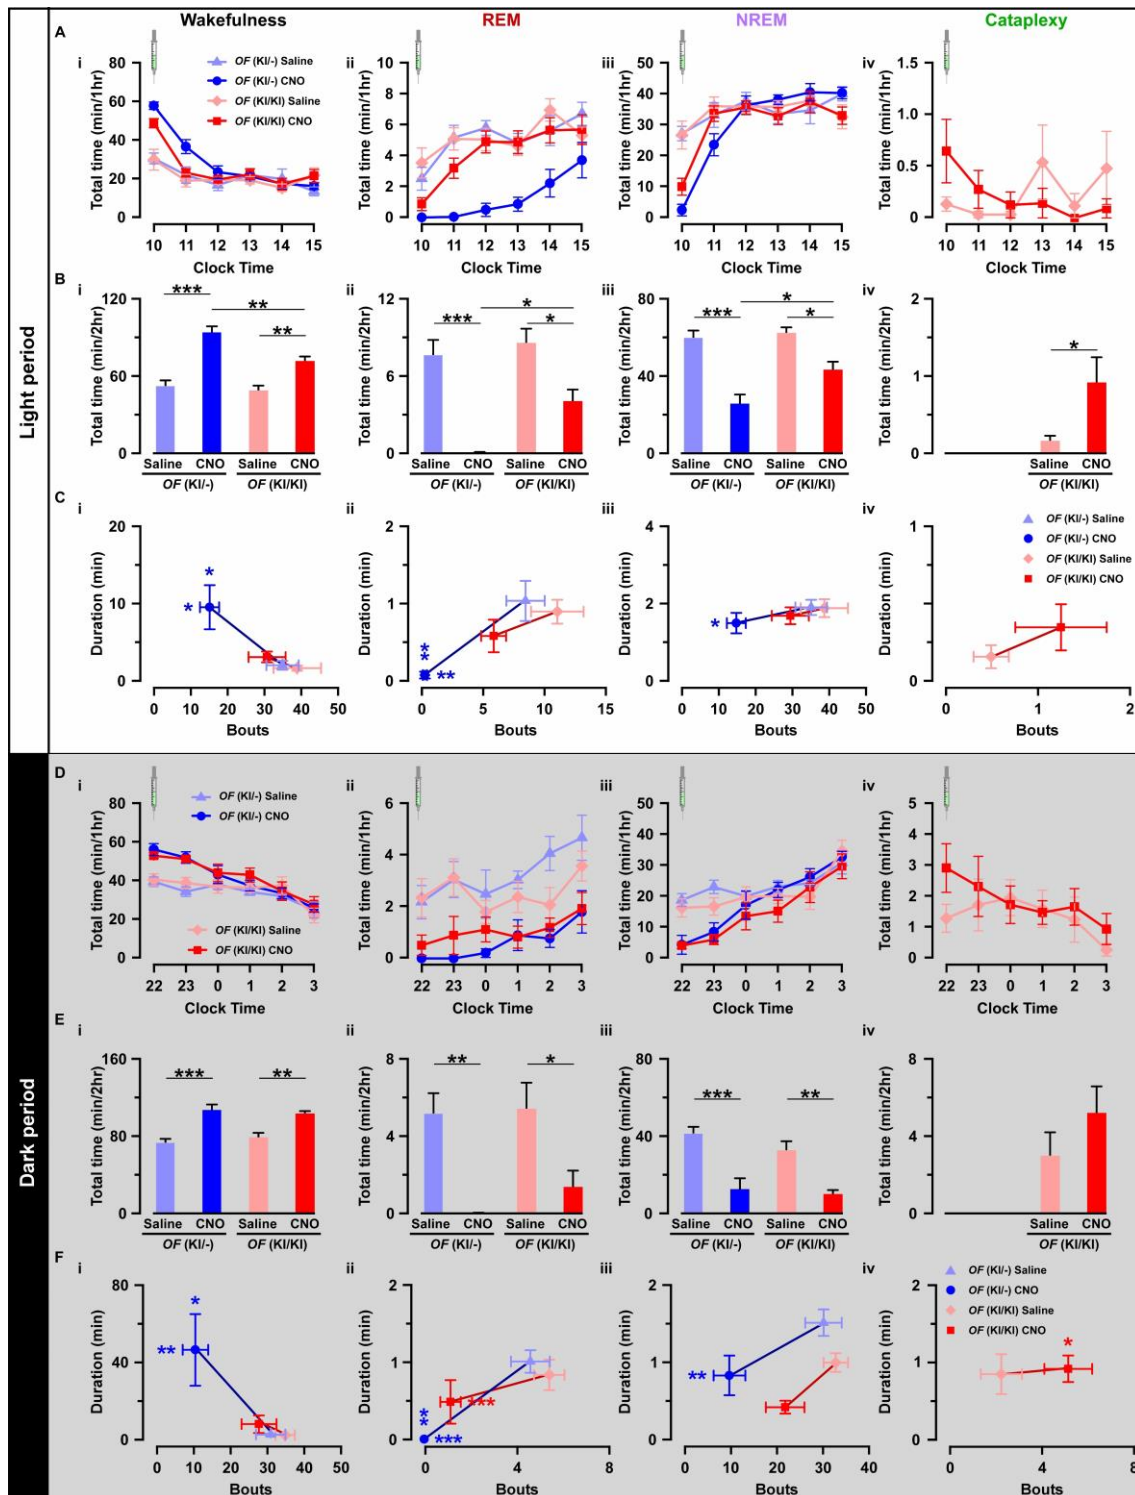

1

2 **Figure 7:** Chemogenetic activation of orexin neurons resulted in altered  
 3 sleep/wakefulness based on the availability of orexin. A, Line graph with symbols  
 4 showing the time spent in wakefulness (i), REM sleep (ii), NREM sleep (iii), and  
 5 cataplexy (iv) during each hour for the 6 hrs following CNO or saline

1 administration during light period. B, Bar graph showing the 2-hr average of the  
2 total time spent in wakefulness (i), REM sleep (ii), NREM sleep (iii), and cataplexy  
3 (iv) following CNO or saline injection during the light period. C, Scatter plot  
4 showing the averaged bout and duration in wakefulness (i), REM sleep (ii),  
5 NREM sleep (iii), and cataplexy (iv). The data in D-F are shown similar to the  
6 representation in A-C, respectively, recorded during the dark period (*OF* (KI/-): n  
7 = 9 mice and *OF* (KI/KI): n = 8 mice). Data represent the mean  $\pm$  SEM in both the  
8 line and bar graph. The *p* values were determined by either two-way ANOVA  
9 followed by a post-hoc Bonferroni test or paired student's *t*-test (cataplexy).

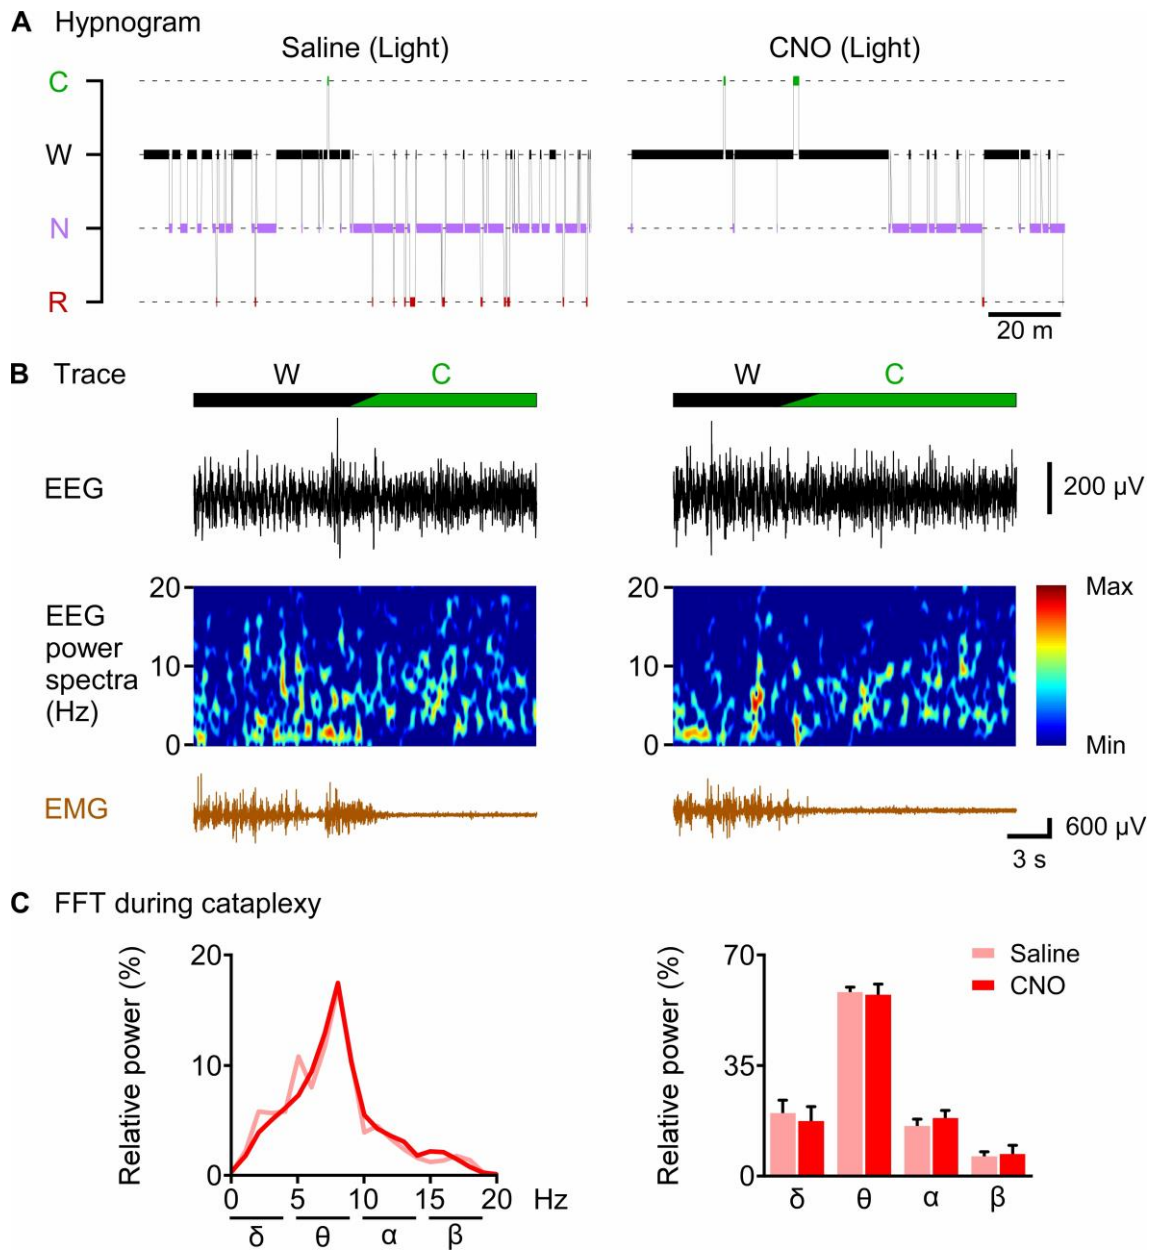

1

2 **Figure 8:** CNO-induced cataplexy was not different from naïve cataplexy. A,

3 hypnogram of 2 hours after saline or CNO administration. B, typical traces

4 showing EEG signal, EEG power spectrum and EMG of cataplexy episode. C,

5 line graph (left) and bar graph (right) showing relative power spectrum of EEG

6 during cataplexy episode in the light period (n = 8 mice). Data represent the mean

7  $\pm$  SEM in both the line and bar graph.

1

| <b>24 hours</b>     | <b>REM</b>   | <b>Cataplexy</b> | <b>NREM</b>  | <b>Wake</b>  |
|---------------------|--------------|------------------|--------------|--------------|
| Total time (min)    | 96.0±5.7     | 18.7±6.3         | 584.6±19.1   | 740.7±18.3   |
| Duration (sec)      | 1429.1±129.7 | 550.9±140.6      | 1951.1±168.5 | 2620.7±177.5 |
| bouts               | 111.4±8.6    | 17.7±5.4         | 450.4±37.4   | 463.6±36.4   |
| <b>Light period</b> |              |                  |              |              |
| Total time (min)    | 57.3±3.8     | 2.1±0.8          | 355.1±13.5   | 305.5±14.6   |
| Duration (sec)      | 626.1±77.4   | 110.0±40.5       | 1134.7±93.6  | 1068.0±70.7  |
| bouts               | 74.0±7.6     | 2.0±0.7          | 239.7±17.0   | 235.0±17.7   |
| <b>Dark period</b>  |              |                  |              |              |
| Total time (min)    | 38.7±4.8     | 16.6±5.6         | 229.5±12.4   | 435.2±11.3   |
| Duration (sec)      | 803.0±83.6   | 440.9±111.3      | 816.4±87.5   | 1552.7±123.7 |
| bouts               | 37.4±4.3     | 15.7±4.9         | 210.7±21.3   | 228.6±20.4   |

2

3 **Table 1:** Vigilance states in *OF* (KI/KI) mice. The table shows total time spent in  
4 each state in minutes, duration of state in seconds and number of episode (bouts)  
5 observed in either 24 hr or in the light or dark period in *OF* (KI/KI) mice (n = 7  
6 mice). Values are represented as mean ± SEM.
